1 **CD4+CCR6+ T cells dominate the BCG-induced transcriptional signature**

2

3 Akul Singhania<sup>1,†</sup>, Paige Dubelko<sup>1,†</sup>, Rebecca Kuan<sup>1</sup>, William D. Chronister<sup>1</sup>, Kaylin Muskat<sup>1</sup>,  
4 Jyotirmoy Das<sup>2</sup>, Elizabeth J. Phillips<sup>3,4</sup>, Simon A. Mallal<sup>3,4</sup>, Grégory Seumois<sup>1</sup>, Pandurangan  
5 Vijayanand<sup>1</sup>, Alessandro Sette<sup>1,5</sup>, Maria Lerm<sup>2</sup>, Bjoern Peters<sup>1,5</sup>, Cecilia S. Lindestam  
6 Arlehamn<sup>1,\*</sup>

7

8 <sup>1</sup> Center for Infectious Disease and Vaccine Research, La Jolla Institute for Immunology, La  
9 Jolla, CA 92037, USA

10 <sup>2</sup> Division of Infection and Inflammation, Department of Biomedical and Clinical Sciences,  
11 Faculty of Medicine and Health Sciences, Linköping University, Linköping, Sweden

12 <sup>3</sup> Institute for Immunology and Infectious Diseases, Murdoch University, Perth, WA 6150,  
13 Australia

14 <sup>4</sup> Vanderbilt University School of Medicine, Nashville, TN 37235, USA

15 <sup>5</sup> Department of Medicine, University of California San Diego, La Jolla, CA 92093, USA

16 † Co-first authors

17 \* Corresponding author

18 Cecilia S. Lindestam Arlehamn

19 Email: [cecilia@lji.org](mailto:cecilia@lji.org)

20

21 Short title: BCG-induced transcriptional signatures

22

23

24 **ABSTRACT**

25 The century-old *Mycobacterium bovis* Bacillus Calmette-Guerin (BCG) remains the only  
26 licensed vaccine against tuberculosis (TB). Despite this, there is still a lot to learn about the  
27 immune response induced by BCG, both in terms of phenotype and specificity. Here, we  
28 investigated immune responses in adult individuals pre and 8 months post BCG vaccination. We  
29 specifically determined changes in gene expression, cell subset composition, DNA methylome,  
30 and the TCR repertoire induced in PBMCs and CD4 memory T cells associated with antigen  
31 stimulation by either BCG or a *Mycobacterium tuberculosis* (*Mtb*)-derived peptide pool.  
32 Following BCG vaccination, we observed increased frequencies of CCR6+ CD4 T cells, which  
33 includes both Th1\* and Th17 subsets, and mucosal associated invariant T cells (MAITs). A  
34 large number of immune response genes and pathways were upregulated post BCG  
35 vaccination with similar patterns observed in both PBMCs and memory CD4 T cells, thus  
36 suggesting a substantial role for CD4 T cells in the cellular response to BCG. These  
37 upregulated genes and associated pathways were also reflected in the DNA methylome. We  
38 described both qualitative and quantitative changes in the BCG-specific TCR repertoire post  
39 vaccination, and importantly found evidence for similar TCR repertoires across different  
40 subjects. The immune signatures defined herein can be used to track and further characterize  
41 immune responses induced by BCG, and can serve as reference for benchmarking novel  
42 vaccination strategies.

43

## 44 INTRODUCTION

45 Tuberculosis (TB), claims over 1.5 million lives every year, and is caused by infection with  
46 *Mycobacterium tuberculosis* (*Mtb*). The Bacillus Calmette-Guerin (BCG) vaccine, first introduced  
47 a century ago, remains the only approved vaccine against TB and most widely used vaccine in  
48 the world. BCG offers variable efficacy against pulmonary TB in all age-groups, but has high  
49 efficacy against severe forms of TB in young children<sup>1-3</sup>. The underlying cause for this variable  
50 efficacy is difficult to pinpoint, and is likely due to multiple factors including geographical location  
51 and exposure to environmental mycobacteria. Many approaches have been considered to  
52 improve the BCG efficacy, including changes in the route of administration from the current  
53 intradermal standard<sup>4-7</sup>, booster vaccinations with either BCG<sup>8-13</sup>, or with *Mtb*-derived antigens  
54<sup>14-16</sup>, and recombinant BCG strains<sup>14,17</sup>. These results have been mixed and a clear enhanced  
55 efficacy has not been achieved. Further rational vaccine improvement efforts are hindered by  
56 our incomplete understanding of the mechanisms of immune protection elicited by BCG.

57 BCG was developed empirically more than a century ago<sup>18</sup>, and yet surprisingly little is  
58 known about BCG-induced immune responses to this date. The specific cell subset or subsets  
59 responsible for mediating BCG's protective effects have not been clarified. While BCG-specific  
60 T cell reactivity does not mediate protection alone, it can be used as an immune correlate of *Mtb*  
61 infection and disease risk<sup>19,20</sup>. An increased level of BCG-specific cells post-vaccination is  
62 frequently reported, but the BCG-specific T cell response has varied considerably between  
63 studies<sup>1,18,21,22</sup>. Thus, studying the cellular response induced by BCG vaccination is a key  
64 component of understanding how it mediates protection and what immune responses are  
65 triggered.

66 Systems biology is a compelling approach that can be used to dissect the heterogeneity of  
67 immune responses following various perturbations (vaccination, infection, disease,  
68 autoimmunity, etc.). The resulting gene signatures and cellular profiles have proven of  
69 significant diagnostic, prognostic, or mechanistic value<sup>23</sup>. Similar to what we have previously

70 described for individuals with latent TB infection (LTBI) as compared to TB-uninfected controls  
71 [63, 64], here we used a comprehensive systems biology/multiomics approach to determine a  
72 global picture of the immune responses triggered by BCG vaccination in humans. We  
73 conducted a longitudinal study of immune responses associated with BCG vaccination in a  
74 cohort of BCG naïve adults. This allowed the opportunity to study cell subset changes, gene  
75 signatures and the TCR repertoire changes induced by BCG vaccination. The results indicate  
76 that BCG induced gene signatures in adults are primarily driven by the expansion of Th1\* CD4  
77 memory T cells and results in both qualitative and quantitative TCR repertoire changes.  
78

## 79 RESULTS

### 80 The frequency of specific T cell subsets increases following BCG vaccination

81 To determine the effects of BCG vaccination on specific T cell responses and gene  
82 expression, PBMC samples were obtained from BCG naïve individuals (pre-vaccination).  
83 Subsequently, these individuals were administered the BCG vaccine, and PBMC samples were  
84 collected again 8 months after intradermal administration of BCG (post-vaccination), chosen as  
85 a representative of a time point where immune responses are expected to have reached a steady  
86 state memory phase (**Figure 1a**). PBMCs from both time points (pre- and post-vaccination)  
87 were assayed by flow cytometry and in parallel stimulated for 24 hours *in vitro* with the vaccine  
88 itself (BCG) or media (unstim) to identify BCG-induced immune responses based on Fluorospot  
89 and RNA-sequencing (**Figure 1a**).

90 We previously described a flow cytometry panel designed to quantitate the relative  
91 frequency of major PBMC subsets<sup>24</sup>. In addition, we have previously identified increased  
92 frequencies of a specific Th subset, Th1\* (CXCR3+CCR6+)<sup>25</sup>, as well as a decrease in MR1+ T  
93 cells in individuals with latent TB infection (LTBI) as compared to TB negative subjects<sup>26</sup>. Here,  
94 we investigated the frequency changes following BCG vaccination of major PBMC subsets and  
95 specific T cell subsets in the absence of antigen-specific stimulation. Upon BCG vaccination we  
96 observed an increase in T cell frequency, which was specifically driven by CD4 T cells while  
97 CD8 T cells remained unchanged (**Figure 1b**). In contrast, the frequency of B cells decreased  
98 following vaccination (**Supplementary figure 1a**). No changes were observed for monocytes,  
99 NK cells, or CD3+CD56+ T cell populations (**Supplementary figure 1a**). Memory CD4 and CD8  
100 T cell populations, as defined by CCR7 and CD45RA expression, remained unchanged  
101 following vaccination (**Supplementary figure 1b, c**). In terms of non-conventional T cells, we  
102 found an increased frequency of MAITs (as defined by 5-OP-RU loaded MR1 tetramers)  
103 following vaccination, but no changes in  $\gamma\delta$  T cells and NKT cells (**Figure 1c**). Finally, we  
104 determined the frequencies of Th subsets, defined by CXCR3, CCR6 and CCR4 expression. All

105 CCR6+ populations, including Th17 and Th1\* cells, increased following BCG vaccination,  
106 whereas CCR6- populations, including Th1 and Th2 cells, remained unchanged (**Figure 1d**).  
107 These results are consistent with our previous identification of Th1\* as the Th subset that  
108 contains the vast majority of *Mtb*-and non-tuberculous mycobacteria (NTM)-specific T cells<sup>25,27</sup>,  
109 and the present results point towards a role of these subsets following BCG vaccination as well.

## 110 **BCG-induced T cell responses and gene expression changes are enhanced upon BCG** 111 **vaccination**

112 We next investigated the magnitude and quality of BCG-induced cellular immune responses.  
113 The magnitude of BCG-stimulated T cell responses, as measured by IFN $\gamma$  Fluorospot assay,  
114 increased post-vaccination (**Figure 2a**). In comparison, no difference was observed in the  
115 magnitude of response against PHA, which was used as a positive control (**Figure 2a**).

116 To determine the effects of stimulation and vaccination on global gene expression, principal  
117 component analysis (PCA) was performed on the RNA-Seq data. The PCA showed a distinct  
118 separation of BCG stimulated and unstimulated samples (**Figure 2b**). In contrast, a smaller  
119 separation was observed in the pre- and post- vaccination samples, in each stimulated condition  
120 (**Figure 2b**).

121 In addition to the PCA analysis we performed differential gene expression analysis  
122 comparing BCG stimulated and unstimulated samples, to explore BCG-induced gene  
123 expression changes pre- and post- vaccination. Upon BCG vaccination, we observed an  
124 increase in the number of differentially expressed genes (DEG) (**Figure 2c; Supplementary**  
125 **table 1**). A total of 549 DEGs were identified when BCG-stimulated vs. unstimulated pre-  
126 vaccination samples were studied; 290 downregulated and 259 upregulated. This compares  
127 with a total of 927 DEGs identified post-vaccination; 527 downregulated and 400 upregulated.  
128 Importantly, BCG-induced T cell responses can be detected prior to vaccination, but they were  
129 enhanced 8 months post-vaccination.

## 130 **BCG-induced gene signatures are more pronounced after vaccination**

131 We next investigated the BCG-induced gene signatures in more detail. We focused on the  
132 genes that were upregulated following BCG stimulation. A majority of the DEGs identified pre-  
133 vaccination were also differentially expressed post-vaccination (**Figure 3a**; 259 genes  
134 upregulated pre-vaccination and 400 genes upregulated post-vaccination, with an overlap of  
135 175 genes). To determine if the unique DEGs identified both pre- and post-vaccination were  
136 truly unique, or if they were below the cut-off ( $p$ adj values  $< 0.05$  and  $\log_2$  fold change  $> 1$  or  $< -$   
137 1) for reaching significance in the other group, we compared fold changes for all upregulated  
138 genes identified pre- and post-vaccination. We observed that although most of these genes  
139 were upregulated both pre- and post-vaccination, the majority of the genes had higher fold  
140 changes post-vaccination (**Figure 3b**; **Supplementary table 1**; the 343 genes above the 45-  
141 degree slope represent those that were higher post-vaccination, and the 141 genes below the  
142 45-degree slope were higher pre-vaccination). This suggests that although similar genes were  
143 upregulated upon BCG stimulation, the magnitude of this increase was greater post-vaccination.

144 Several immune-related genes were upregulated in response to BCG stimulation both pre-  
145 and post-vaccination. These included chemokine ligands (CCL3, CCL4, CCL20, CXCL1,  
146 CXCL2, CXCL3, and CXCL9), T cell activation markers (CD38, CD69, and TNFRSF4 (OX40)),  
147 and cytokines (IFNG, IL1B, IL32, GZMB, and TNF), reflecting the broad immune response  
148 triggered by stimulation with BCG (**Supplementary table 1**). The genes that had a higher fold  
149 change post-vaccination included T cell activation genes (CD274 (PDL1) and DPP4 (CD26)),  
150 cytokines (IL13, IL17F, IL22, GZMA), chemokine ligands (CXCL5, CXCL8, CXCL13), and  
151 ligands for CXCR3 (CXCL10 (IP-10), and CXCL11), indicating a boosting of certain aspects of  
152 the BCG-induced immune response post-vaccination (**Supplementary table 1**).

153 Functional enrichment analysis of the upregulated genes showed that similar pathways,  
154 such as cytokine response, interleukin signaling and secreted factors, were identified in both the  
155 genes that were higher post-vaccination (**Figure 3c**; **Supplementary table 2**) and in genes  
156 higher pre-vaccination (**Figure 3d**; **Supplementary table 2**). However, as observed above, the

157 magnitude of BCG related changes was greater post-vaccination and the common pathways  
158 identified in both groups had much greater significance post-vaccination. Moreover, pathways  
159 such as IL-23 mediated signaling, and IL-10 and IL-17 signaling were observed only in genes  
160 higher in post-vaccination (**Figure 3c**). Cell-type enrichment of upregulated genes showed an  
161 enrichment of activated CD4 and CD8 activated T cells in both groups (**Figure 3c and 3d**), and  
162 a slight enrichment of NK cells post-vaccination only (**Figure 3c**). These results demonstrate an  
163 increase in the magnitude of BCG-specific gene expression changes post BCG vaccination.  
164 Moreover, pathway enrichment suggested that a Th1\*/Th17-like signature is associated with  
165 BCG vaccination, which was also observed by flow cytometry analysis.

### 166 **BCG-induced DNA methylation changes reflect the gene signatures**

167 A higher magnitude of response upon microbial challenge is expected in epigenetically  
168 reprogrammed cells <sup>28</sup>, and BCG has been shown to induce DNA methylation (DNAm) changes  
169 <sup>29</sup>. Therefore, we next assessed the methylation status of >850,000 CpG sites in DNA derived  
170 from PBMC pre- and post-vaccination. First, using the Houseman algorithm to deconvolute cell  
171 types from PBMC using DNAm data <sup>30</sup>, we found, similarly to the flow cytometry analysis an  
172 increased frequency of CD4 T cells post vaccination (**Supplementary figure 2a**). Unlike the  
173 PCA analysis for RNAseq of unstimulated PBMCs, the PCA analysis of the DNAm data  
174 revealed a clear separation between pre- and post-vaccination samples (**Figure 4a**). We next  
175 determined the differentially methylated CpG sites and identified 15,679 hypomethylated and  
176 15,309 hypermethylated CpG sites (**Supplementary Figure 2b**), which were both primarily  
177 found in the gene bodies and intragenic regions (**Supplementary Figure 2c**). The CpG sites  
178 were mapped to genes to identify differentially methylated genes (DMGs), and a subsequent  
179 KEGG pathway analysis revealed the pathways affected by the DNAm changes (**Figure 4b**).  
180 We identified an IFN $\gamma$ - and IL-17-related pathway (inflammatory bowel disease), a TNF- and  
181 CXCL10-related pathway (TNF signaling pathway), and a NOD2-like receptor signaling  
182 pathway. A comparison between the DMGs and the DEGs identified post-vaccination revealed



183 that the majority of the hypo-methylated/upregulated genes were found in the identified  
184 pathways (**Figure 4c, d**). These results suggest a correlation between genes identified as  
185 upregulated in the RNAseq analysis and hypo-methylated genes.

### 186 **MTB300-specific reactivity is not boosted by BCG vaccination**

187 Next, we wanted to determine whether reactivity against a peptide pool defined in healthy  
188 *Mtb*-infected individuals, and with peptides homologous to peptides found in BCG, was boosted  
189 following BCG vaccination. PBMC samples from both time points (pre- and post- vaccination)  
190 were stimulated for 24h *in vitro* with the MTB300 peptide pool, as described above, and  
191 underwent Fluorospot analysis and RNA-Sequencing. The PCA revealed little separation  
192 between the MTB300 stimulated and unstimulated samples, suggesting stimulation with the  
193 MTB300 peptide pool does not have a large impact on overall global gene expression (**Figure**  
194 **5a**). The lack of separation also suggested lower MTB300-specific reactivity as compared to  
195 that seen upon BCG stimulation. As previously noted, there was a smaller, but consistent,  
196 separation between pre- and post- vaccination samples within each stimulation condition  
197 (**Figure 5a**). Moreover, while the magnitude of MTB300-specific IFN $\gamma$  response increased post-  
198 vaccination (**Figure 5b**), it was lower than what was observed for BCG stimulation (**Figure 2a**).

199 Differential gene expression analysis comparing MTB300 stimulated to unstimulated  
200 samples further revealed a lower number of DEGs overall (**Figure 5c; Supplementary table 1**).  
201 Additionally, no increase in the number of DEGs was observed post-vaccination (**Figure 5c;**  
202 **Supplementary table 1**). Moreover, there was decreased overlap between pre- and post-  
203 vaccination, and comparison of upregulated genes did not show an increased magnitude of log2  
204 fold changes post-vaccination, with distinct sets and similar number of genes pre- and post-  
205 vaccination (**Figure 5d; Supplementary table 1**; 113 genes above the 45-degree slope, and  
206 106 genes below the 45-degree slope). Functional enrichment analysis for genes with higher  
207 fold changes post-vaccination included pathways such as cytokine and interleukin signaling,  
208 similar to that observed in BCG stimulated samples post-vaccination, albeit with lower

209 significance (**Figure 5e; Supplementary table 2**). There was a high enrichment for interferon  
210 signaling upon MTB300 stimulation post-vaccination, with type I, type II and Jak-STAT signaling  
211 pathways being significant. In contrast, genes with higher fold changes pre-vaccination were not  
212 specifically enriched for any biological functions, with three pathways barely reaching the  
213 significance cutoff (**Figure 5f; Supplementary table 2**). These results suggest that, although  
214 there is some similarity in the pathways being affected, the MTB300-specific responses are  
215 weakly induced following BCG vaccination, especially when compared to the responses upon  
216 stimulation with BCG.

### 217 **Gene signatures reflect specific cell subset increases post-vaccination**

218 We have previously defined a Th1\*-specific gene signature<sup>25</sup>. Given the likely importance of  
219 these Th1\* cells in Mtb infection, we further assessed the increase in Th1\* cells observed upon  
220 BCG vaccination *in silico* in the RNA-sequencing data. Moreover, we have defined a MAIT-  
221 specific gene signature<sup>26</sup> which was also used *in silico* in the RNA sequencing data. Only  
222 upregulated genes from the Th1\* and MAIT signatures were used to identify cell-specific gene  
223 expression (**Supplementary table 3**). We detected an overall increase in the MAIT and Th1\*  
224 cell signatures in the BCG stimulated samples compared to the MTB300 stimulated and  
225 unstimulated samples (**Supplementary figure 3a and b**). This increase was further enhanced  
226 in the BCG post-vaccination samples, similar to the observation in the flow cytometry data.  
227 These results suggest an increase in the CD4 T cell frequency following BCG vaccine,  
228 specifically in CCR6+ (Th1\* and Th17) cell subsets.

### 229 **BCG-induced gene expression in PBMCs is primarily driven by CD4 memory T cells**

230 As CD4 T cells are increased upon BCG vaccination, and as memory T cell responses are  
231 enhanced upon stimulation with BCG, we also performed RNA-sequencing on CD4 memory T  
232 cells isolated from the same individuals as above, pre- and post-vaccination. As with PBMC  
233 samples, CD4 memory T cells were stimulated with DMSO (unstimulated), MTB300 peptide  
234 pool, and BCG. Differential gene expression analysis comparing BCG stimulated samples to

235 unstimulated samples showed an increase in the number of DEGs post-vaccination (**Figure 6a**;  
236 **Supplementary table 1**; 286 genes upregulated pre-vaccination and 530 genes upregulated  
237 post-vaccination, with an overlap of 205 genes), similar to that observed in PBMCs (**Figure 3a**).  
238 In contrast, and similar to the observations in PBMCs (**Figure 5c**), MTB300 stimulated samples  
239 had a much small number of genes differentially expressed compared to unstimulated samples,  
240 and this did not increase post vaccination (**Figure 6a**). Focusing on the effect of BCG  
241 stimulation on gene expression, PCA showed a separation between the BCG stimulated and the  
242 unstimulated samples across PC1 (**Figure 6b**), however, to a lesser extent than what was  
243 observed in PBMCs (**Figure 3a**). Moreover, a reduced separation was observed in pre- and  
244 post- vaccination samples within each stimulation condition (**Figure 6b**). Correlation between  
245 the unique and shared upregulated DEGs between pre- and post-vaccination BCG stimulated  
246 samples showed that the majority of genes had a higher fold change post-vaccination (**Figure**  
247 **6c**; **Supplementary table 1**; 467 genes above the 45-degree slope, and 144 genes below the  
248 45-degree slope), also consistent with PBMC analysis (**Figure 3b**). Functional enrichment for  
249 genes with higher fold changes post-vaccination identified similar pathways as those observed  
250 in PBMC post-vaccination, such as cytokine signaling and interaction and interleukin signaling  
251 (**Figure 6d**; **Supplementary table 2**). Moreover, a Th1\*/Th17 type signature was also observed  
252 here as evidenced by the IL-23 mediated signaling pathway (**Figure 6d**, showing the 10 most  
253 significant pathways), and IL-17 signaling pathway (**Supplementary table 2**). In contrast, the  
254 smaller number of genes with higher fold changes pre-vaccination did not result in any  
255 significant pathways. The involvement of Th1\*/Th17 cells were further strengthened by the  
256 observation that there was an increase in BCG-induced IFN $\gamma$  and IL-17 production in CD4+ T  
257 cells following BCG vaccination (**Figure 6e**). No increase in IFN $\gamma$  production was observed in  
258 CD8+ or CD4-CD8- T cells (**Figure 6e**). *In silico* analysis of the Th1\* signature (**Supplementary**

259 **table 3**), as before, showed an increase in the Th1\*-specific gene expression in BCG stimulated  
260 samples, with a further increase post-vaccination (**Figure 6f**).

261 With the analysis in CD4 memory T cells showing similar results as those observed in  
262 PBMCs, we directly compared the DEGs obtained from BCG stimulated compared to  
263 unstimulated samples, post-vaccination. Majority of the genes showed similar perturbations in  
264 CD4 memory T cells and PBMCs, albeit to differing fold change and significance levels (**Figure**  
265 **6g; Supplementary table 1**). Only 23 genes were identified to be significant in both PBMC and  
266 CD4 memory T cells that had log<sub>2</sub> fold changes in opposite direction (upregulated in CD4  
267 memory T cells, but downregulated in PBMCs, and vice versa). These results indicate an  
268 increase in the magnitude of BCG related gene expression changes post BCG vaccination in  
269 CD4 memory T cells. Moreover, the results observed in CD4 memory T cells were similar to  
270 those in PBMCs, suggesting that majority of the BCG related gene expression changes  
271 observed in PBMCs are driven primarily by CD4 memory T cells, upon BCG vaccination.

### 272 **Stimulation with BCG leads to the expansion of specific clonotypes post BCG** 273 **vaccination**

274 To determine whether BCG vaccination leads to the specific expansion of BCG-reactive  
275 clonotypes we performed TCR Sequencing on BCG naïve individuals pre, and 8 months post  
276 BCG vaccination. To expand antigen-specific T cells, PBMCs were stimulated with MTB300, a  
277 tetanus pool, and BCG for 14 days *in vitro*. Cultures were harvested and DNA was then purified  
278 for TCR sequencing using the ImmunoSEQ service from Adaptive Biotechnologies  
279 (**Supplementary Table 4**). Every sample had a culture replicate and the ex vivo repertoire of  
280 CD4 T cells was utilized as a comparison. We assessed the productive repertoire of each  
281 sample, i.e. the unique in-frame rearrangements that do not contain a stop codon, as well as the  
282 frequency of these productive clonotypes. We identified a similar number of clonotypes covering  
283 eighty percent of the productive repertoire across both replicates across all donor samples in  
284 pre- and post- vaccination samples, in all three stimulation conditions (**Figure 7a**). In each

285 stimulated sample there was a selection and expansion of stimuli-specific clonotypes, resulting  
286 in fewer unique rearrangements compared to the ex vivo CD4 sample (**Figure 7a**).

287         Next, we compared the productive repertoire of samples stimulated with the peptide  
288 pools to the corresponding ex vivo CD4 samples, and identified clonotypes that were  
289 significantly perturbed as a result of BCG (**Supplementary Figure 4**), and MTB300 and  
290 Tetanus stimulation (**Supplementary Figure 5**). A similar number of clonotypes were  
291 significantly expanded upon BCG stimulation across all donors, pre-vaccination  
292 (**Supplementary Table 5**), and this number was increased post-vaccination (**Supplementary**  
293 **table 5**). To identify reproducible clonotypes, we only retained those clonotypes that expanded  
294 significantly across both replicates ( $-\log_2 \text{OR} > 1$  and FDR  $p\text{-val} < 0.05$  in both replicates) for an  
295 individual donor within each stimulation condition. These reproducible clonotypes within a  
296 stimulation condition were overlapped across all three stimulation conditions, to obtain  
297 clonotypes that expanded upon BCG stimulation only, MTB300 stimulation only, and clonotypes  
298 expanded in both BCG and MTB300 stimulation. Any clonotype expanded upon tetanus  
299 stimulation was excluded from further analysis, to remove any non-specific bystander effects  
300 associated with the *in vitro* culture (**Figure 7b**). This analysis was performed independently in  
301 pre- and post-vaccination samples.

302         To determine if the clonotypes that expanded post-vaccination corresponded to an  
303 increased immune response or simply a result of stimulation, we compared the expanded  
304 clonotypes, pre- and post- vaccination, based on the exact clonotype rearrangement sequence.  
305 This indicated that although there was an overlap between clonotypes expanded pre- and post-  
306 vaccination, this was a very small proportion, and majority of the clonotypes expanded post-  
307 vaccination were unique (**Figure 7c**). This suggests that the unique clonotypes that expanded  
308 post-vaccination are a result of vaccination, and not stimulation with either the BCG or MTB300  
309 peptide pools. As this overlap was based on the exact clonotype rearrangement sequence, we  
310 also performed GLIPH analysis, which clusters TCRs based on similar MHC-restricted peptide

311 antigen binding. The GLIPH analysis revealed a small overlap between pre- and post-  
312 vaccination clonotypes (**Supplementary Table 6**), further indicating that the expanded  
313 clonotypes post-vaccination are a direct result of the vaccination.

314 To further examine the homogeneity of TCR repertoires before and after BCG  
315 vaccination, we used TCRMatch<sup>31</sup> to calculate similarity scores among the CDR3 $\beta$  sequences  
316 obtained from the subjects. CDR3 $\beta$  sequences obtained from each subject were separated into  
317 four groups depending on vaccination status at the time of sample collection and expansion  
318 status in response to BCG stimulation *in vitro*. Scores were computed for pairs of CDR3 $\beta$   
319 sequences within each group, and the fraction of scores exceeding thresholds of 0.84, 0.90, and  
320 0.97 were computed (**Supplementary Figure 6a-c**). The fraction of scores exceeding the  
321 threshold was found to be significantly higher in expanded TCRs compared to unexpanded  
322 TCRs post-BCG ( $p=0.016$  for 0.84,  $0.0029$  for 0.90, and  $p<0.0001$  for 0.97). We also found a  
323 significant difference between expanded vs. unexpanded TCRs pre-BCG for the lowest  
324 threshold ( $p=0.013$  for 0.84) and in the fraction of scores over 0.97 ( $p=0.0102$ ), which was  
325 driven by high similarity scores in one subject. To determine whether repertoire homogeneity  
326 was detectable between different subjects, we used TCRMatch to compare CDR3 $\beta$  sequences  
327 expanded pre- and post-BCG across subjects (**Supplementary Figure 6d**). The fraction of  
328 scores exceeding 0.97 for each cross-subject comparison, separated by BCG vaccination  
329 status, revealed that subjects post-BCG had a higher fraction of those scores (14 matches  
330 above 0.97 resulting from 9 cross-subject comparisons of post-BCG expanded TCRs, compared  
331 to zero matches of pre-BCG expanded TCRs). Of the 14 strong matches between subjects, 7  
332 were found to be exact matches.

333 We examined the subjects with at least 1 strong match further by assessing similarity  
334 between their HLA alleles. All subjects were HLA typed (**Supplementary Table 7**), and  
335 therefore the number of shared HLA alleles vs. the fraction of TCRMatch scores above 0.97

336 could be compared. We found a positive correlation between the number of shared HLA class II  
337 alleles and the fraction of TCRMatch scores exceeding 0.97 (**Supplementary Fig. 6e**). The 14  
338 strong matches were also analyzed for evidence of concordance in gene usage. For the 7  
339 identical CDR3 $\beta$  sequences there was an exact match between subjects in all available VDJ  
340 and allele calls. For all the strong matches, 13/14 (93%) were determined to have the same V  
341 family, that ranged between 2.3-12.4% in prevalence across the subjects.

342 Finally, the magnitude of expansion, represented by the sum of the number of templates  
343 identified for each clonotype (total templates), of the clonotypes pre- and post-vaccination  
344 indicated a much greater expansion post-vaccination (**Figure 7c,d**). This significant increase in  
345 the degree of expansion was only evident upon stimulation with BCG (in BCG only, and in  
346 shared BCG and MTB300), and not upon stimulation with MTB300 only (**Figure 7d**). Taken  
347 together, these results indicate both a quantitative and qualitative change in clonotypes post-  
348 vaccination. There were new clonotypes observed and an overall expansion of clonotypes post-  
349 vaccination upon stimulation with BCG.

350

## 351 DISCUSSION

352 Here, we employed a systems biology approach to characterize the T cell subsets,  
353 cytokine secretory profiles, and other cell subset markers that change following BCG  
354 vaccination to yield insight into potential new correlates of protection. Specifically, total PBMC  
355 and purified CD4+ T cell population transcriptomics were used in combination with DNA  
356 methylome analysis and other immunological techniques, such as flow cytometry and  
357 fluorospot, to characterize BCG-induced responses in a longitudinal adult cohort who provided  
358 blood samples 1-2 weeks prior to and 8 months following BCG vaccination. Gaps in knowledge  
359 surrounding BCG-induced immunity, both in terms of antigen-specificity and functional  
360 responses, particularly the part of the response associated with protection against *Mtb* that  
361 should be boosted by a vaccine <sup>32-34</sup>, impede efforts to improve variable BCG efficacy. Few  
362 studies have used multi-omics approaches in the context of BCG vaccination and were  
363 conducted mostly in animals. Cortes et al. conducted a transcriptomic analysis in mice  
364 comparing BCG vaccinated and naïve mice before and after *M. bovis* challenge and found  
365 Th17-associated cytokines correlated with protection <sup>35</sup>. Darrah et al. used a combination of  
366 immunohistochemistry, flow cytometry and single cell sequencing to characterize the immune  
367 response in macaques after intravenous administration of BCG, a route that was largely  
368 successful as 9/10 vaccinated animals were protected even after challenge with virulent *Mtb* 6  
369 months post vaccination <sup>4</sup>. Similarly, Hoft et al. used systems immunology to show that oral and  
370 mucosal BCG delivery induced distinct molecular signatures, which could potentially permit the  
371 identification of genes that should be differentially targeted by vaccines geared toward inducing  
372 optimal systemic or mucosal TB immunity <sup>36</sup>. A transcriptional signature for BCG will serve as an  
373 important comparator for novel vaccination strategies, facilitating their design and evaluation.

374 Our results reaffirm the critical role of T cells, particularly CD4 T cells, in mediating  
375 antimycobacterial immunity <sup>37</sup>, both in the context of *Mtb* infection and vaccination <sup>20,38-40</sup>. The  
376 response at the mRNA level observed from post-BCG CD4 memory T cells was very similar to



377 those in post-BCG PBMCs, suggesting that the majority of the BCG-induced gene expression  
378 changes observed in PBMCs are driven primarily by CD4 memory T cells upon BCG  
379 vaccination. Other studies have found that BCG induces higher CD4 T cell responses than CD8  
380 responses<sup>22,41</sup>, and with increased levels of BCG-reactive cells post-vaccination<sup>21,22</sup>.

381 We further characterized the particular cell subset within the CD4 compartment that  
382 mediates BCG-induced responses through cell surface phenotypes and gene signatures and  
383 found that it is associated with Th1\* (CXCR3+CCR6+CCR4-) cells. Our group previously  
384 showed that this CD4+ Th subset contained the majority of *Mtb*-<sup>42</sup> and NTM-specific T cells<sup>27</sup>.  
385 Moreover, we later showed that Th1\* was involved in the immune response following natural  
386 *Mtb* infection, since Th1\* was increased in individuals with LTBI compared to TB negative  
387 controls<sup>25</sup>. Here, we found an increase of CCR6+ CD4 T cells (including Th1\* and Th17  
388 subsets) and CD3+MR1+ MAITs following BCG vaccination. These frequency changes could  
389 also be recapitulated *in silico* in the RNA-seq data as detected by an overall increase in  
390 previously characterized MAIT and Th1\* cell subset signatures<sup>25,26</sup> post vaccination. The  
391 increase in the frequency of MAIT cells observed here is in contrast to what was recently found  
392 in infants following primary BCG vaccination and following BCG revaccination in tuberculin skin  
393 test positive adults (consistent with prior *Mtb* infection)<sup>43</sup>, which are both different from our  
394 cohort of primary vaccinated adults. Providing further evidence for the importance of the CCR6+  
395 CD4 T cells, we also found increases in IL-23 mediated and IL-17 signaling pathways following  
396 BCG stimulation post vaccination both in PBMC and CD4 memory T cells. In addition, we found  
397 an increase in the magnitude of BCG-induced CCR6+ associated IFN $\gamma$  and IL-17 production in  
398 CD4+ T cells following BCG vaccination.

399 Several studies suggest an important role for these antigen-specific Th1\* cells in the  
400 immune response against mycobacteria and they may be a promising candidate for a correlate  
401 of protection against *Mtb*. Th1\* cells also share characteristics with a CCR6+ CD4 cell subset  
402 recently described as preferentially enriched in a cohort of TB non-progressors compared to

403 those who progressed to active TB <sup>44</sup>. In non-human primates (NHP), antigen-specific CD4 T  
404 cells in the PBMCs and bronchoalveolar lavage fluid of rhesus macaques that received BCG  
405 intravenously had a similar Th1/Th17 phenotype and importantly the majority of these animals  
406 (9/10) were protected from *Mtb* challenge 6 months post-BCG <sup>4</sup>. This Th1\*-like cell subset has  
407 also been shown to be associated with protection against *Mtb* in other NHP studies <sup>45,46</sup>. Given  
408 the high diversity in results and outcomes across studies and models, a correlate of vaccine-  
409 induced protection will most likely not be a single marker, which makes it important to study  
410 additional cell markers such as activation, migration and memory markers, as well as functional  
411 secretory profiles in order to separate immunopathology from protective antigen-specific T cell  
412 responses that can serve as correlates of protection <sup>47-49</sup>.

413 In the present study, we also found ligands for CXCR3, CXCL10 (IP-10) and CXCL11  
414 that exhibited a higher fold-change post-vaccination. Antigen-specific Th1\* CD4 T cells express  
415 the tissue homing chemokine receptor CXCR3 and could thus respond to these ligands. It has  
416 been proposed that post-vaccination measurement of multifunctional responses in *Mtb*-specific,  
417 relatively undifferentiated, memory T cell subsets retaining the capacity to traffic to the lung may  
418 be more indicative of protective immunity against TB <sup>50</sup>. Murine models have implicated  
419 migration markers, including CXCR3 <sup>51,52</sup>, that confer the ability of CD4 T cells to exit the  
420 circulation and enter the lung to interact with *Mtb*-infected APCs, as promising correlates of  
421 protection candidates.

422 Reactivity against our *Mtb*-derived peptide pool defined in healthy *Mtb* infected interferon  
423 gamma release assay (IGRA) positive individuals, MTB300, was also boosted post-BCG  
424 vaccination, however to a lesser degree than BCG-induced immune responses. MTB300  
425 contains 255 peptides out of a total of 300 that are homologous between *Mtb* and BCG. This  
426 result provides further evidence that the antigen-specific human T cell responses triggered by  
427 BCG vaccination are not fully understood. Determination of BCG-specific epitopes and antigens  
428 will provide crucial immune monitoring reagents.

429           Most genes upregulated post-BCG vaccination also tend to be upregulated, albeit to a  
430 lesser extent, pre-vaccination. This suggests a boosting of the response that is present pre-  
431 vaccination. The BCG-specific response is probably heavily influenced by exposure to  
432 mycobacteria that the immune system has been primed with in the past. Moreover, BCG  
433 vaccination resulted in an overall increase in the BCG-induced response, but DEGs and BCG-  
434 specific immune responses were also identified pre-vaccination following BCG stimulation. This  
435 can be, at least partly, explained by previous NTM exposure resulting in cross-reactive immune  
436 responses <sup>27</sup>. The signatures we have identified here can be compared to those found in  
437 children that were vaccinated at birth and following BCG revaccination, when available.  
438 Especially given the protection from severe TB observed in children and lack of efficacy in  
439 adults mediated by BCG.

440           BCG vaccination resulted in expanded TCR repertoires with higher intra-repertoire  
441 homogeneity than unexpanded TCRs, as well as similar TCR repertoires across different  
442 subjects. Thus, the TCRs appear to converge towards similar TCR sequences more than they  
443 diversify following BCG vaccination. Clustered TCRs have been described previously in the  
444 responses to herpesviruses and *Mtb* <sup>53,54</sup>. These similar TCR repertoires may be influenced by  
445 similarities in HLA alleles. Future studies can reveal how certain HLA alleles influence BCG  
446 vaccine efficacy and whether this can be used as a means of predicting efficacy.

447           In conclusion, this study provides a detailed characterization of BCG-induced immune  
448 responses and TCR clonotypes in adults that were vaccinated with BCG. These findings inform  
449 our understanding of the immune response induced by the BCG vaccine and provides means to  
450 track longitudinal changes in the specific T cells in many different settings.

451

## 452 MATERIALS AND METHODS

### 453 Ethics statement

454 All participants provided written informed consent for participation in the study. Ethical  
455 approval was obtained from the Institutional review boards at Linköping University (2015/150-  
456 32) and the La Jolla Institute for Immunology (VD-140).

### 457 Study subjects

458 We recruited 17 TB negative and BCG naïve individuals for participation in the study who  
459 were offered the BCG vaccine through their medical school at Linköping University. Their *Mtb*  
460 infection status was confirmed by a negative tuberculin skin test and IFN $\gamma$ -release assay (IGRA;  
461 T.Spot-TB, Oxford Immunotec).

462 Venous blood was collected in heparin-containing blood bags 1-2 weeks prior to BCG  
463 vaccination and 8 months after the vaccination. Peripheral blood mononuclear cells (PBMC)  
464 were purified from whole blood by density-gradient centrifugation (Ficoll-Hypaque, Amersham  
465 Biosciences), according to the manufacturer's instructions. Cells were cryopreserved in liquid  
466 nitrogen suspended in FBS (Gemini Bio-Products) containing 10% (vol/vol) DMSO (Sigma).  
467 Cryopreserved cells were shipped from Linköping University to LJI for analysis.

### 468 HLA typing

469 Participants were HLA typed by an ASHI-accredited laboratory at Murdoch University  
470 (Institute for Immunology & Infectious Diseases, Western Australia) as previously described<sup>55</sup>.  
471 HLA typing for class I (HLA A, B, C) and class II (DQA1, DQB1, DRB1, 3, 4, 5, DPB1) was  
472 performed using locus-specific PCR amplification of genomic DNA. Patient-specific, barcoded  
473 primers were used for amplification. Amplified products were quantitated and pooled by subject  
474 and up to 48 subjects were pooled. An indexed (8 indexed MiSeq runs) library was then  
475 quantitated using Kappa universal QPCR library quantification kits. Sequencing was performed  
476 using an Illumina MiSeq using 2x300 paired-end chemistry. Reads were quality-filtered and  
477 passed through a proprietary allele calling algorithm and analysis pipeline using the latest IMGT

478 HLA allele database as a reference. The algorithm was developed by E.J.P. and S.A.M. and  
479 relies on periodically updated versions of the freely available international immunogenetics  
480 information system (<http://www.imgt.org>) and an ASHI-accredited HLA allele caller software  
481 pipeline, IIID HLA analysis suite (<http://www.iiid.com.au/laboratory-testing/>). The HLA type of  
482 each subject is listed in **Supplementary table 7**.

### 483 **Peptides and other stimuli**

484 Peptides were synthesized as crude material on a small (1mg) scale by A&A, LLC (San  
485 Diego, CA). Multi-epitope peptide pools (“megapools”) were prepared as previously described  
486 <sup>56</sup>. Individual peptides were resuspended in DMSO, and equal amounts of each peptide were  
487 pooled to construct the peptide pool. After lyophilization, the peptide pools were resuspended in  
488 DMSO, aliquoted, and stored at -20°C. Two different peptide pools were used; a peptide pool  
489 containing 300 Mtb-derived 15-20-mer peptides (MTB300) primarily HLA class II restricted <sup>56</sup>,  
490 and a peptide pool with 125 peptides derived from the *Clostridium tetani* toxin (TT) sequence <sup>57</sup>.

491 In addition to peptide pool, PBMCs were also stimulated with *M. bovis* BCG-Danish or  
492 Pasteur at 100 µg/ml.

### 493 **Fluorospot assay**

494 Antigen-specific cellular responses were measured by IFN $\gamma$  Fluorospot assay with all  
495 antibodies and reagents from Mabtech (Nacka Strand, Sweden). Plates were coated overnight  
496 at 4°C with a mouse anti-human IFN $\gamma$  (clone 1-D1K) antibody. Briefly, 2x10<sup>5</sup> cells were added to  
497 each well of pre-coated Immobilon-FL PVDF 96-well plates (Mabtech) in the presence of 2  
498 µg/ml peptide pool, or 100µh/ml BCG, and incubated at 37°C in humidified CO<sub>2</sub> incubator for 20-  
499 24 hrs. Cells stimulated with DMSO (corresponding to the percent DMSO in the peptide pools)  
500 were used to assess non-specific/background cytokine production and PHA stimulation at 10  
501 µg/ml was used as a positive control. All conditions were tested in triplicates. Fluorospot plates  
502 were developed according to manufacturer’s instructions (Mabtech). Briefly, cells were removed

503 and plates were washed 6 times with 200  $\mu$ l PBS/0.05% Tween 20 using an automated plate  
504 washer. After washing, 100  $\mu$ l of antibody mixture containing anti-IFN $\gamma$  (7-B6-1-FS-FITC)  
505 prepared in PBS with 0.1% BSA was added to each well and plates were incubated for 2 hrs at  
506 room temperature. Plates were again washed 6 times with 200  $\mu$ l PBS/0.05% Tween 20 using  
507 an automated plate washer and incubated with diluted fluorophores (anti-BAM-490) for 1 hr at  
508 room temperature. Finally, plates were once more washed 6 times with 200  $\mu$ l PBS/0.05%  
509 Tween 20 using an automated plate washer and incubated with fluorescence enhancer for 15  
510 mins at room temperature. The plates were blotted dry and spots were counted by computer-  
511 assisted image analysis (AID iSpot, Aid Diagnostica GMBH, Strassberg, Germany). Responses  
512 were considered positive if the net spot-forming cells (SFC) per  $10^6$  PBMC were  $\geq 20$ , the  
513 stimulation index  $\geq 2$ , and  $p \leq 0.05$  by Student's t-test or Poisson distribution test.

#### 514 **Flow cytometry**

515 Several different flow cytometry panels were used. Cryopreserved PBMCs were thawed in  
516 RPMI supplemented with 5% human serum (Gemini Bio-Products, West Sacramento, CA), 1%  
517 Glutamax (Gibco, Waltham, MA), 1% penicillin/streptomycin (Omega Scientific, Tarzana, CA),  
518 and 50U/ml Benzoylase (Millipore Sigma, Burlington, MA). Cells were then washed and counted.  
519 1 million cells were then blocked in 10% FBS for 10 mins at 4°C. After blocking, cells were  
520 stained with APCeF780 conjugated anti-CD4 (clone RPA-T4, eBiosciences), AF700 conjugated  
521 anti-CD3 (UCHT1, BD Pharmigen), BV650 conjugated anti-CD8a (RPA-T8, Biolegend), PECy7  
522 conjugated anti-CD19 (HIB19, TONBO), APC conjugated anti-CD14 (61D3, TONBO),  
523 PerCPCy5.5 conjugated anti-CCR7 (G043H7, Biolegend), PE conjugated anti-CD56 (CMSSB,  
524 eBiosciences), FITC conjugated anti-CD25 (M-A251, BD Pharmigen), eF450 conjugated anti-  
525 CD45RA (HI100, eBiosciences) and fixable viability dye eF506 (eBiosciences) for 30 mins at  
526 4°C. Cells were then washed twice and acquired on a BD FACSAria flow cytometer (BD

527 Biosciences, San Jose, CA) to measure the frequency of different cell subsets. The gating  
528 strategy for this panel was performed as previously reported <sup>24</sup>.

529 Cells were also stained with BV650 conjugated CCR6 (G034E3, BioLegend), CXCR3-APC  
530 (1C6/CXCR3, BD Biosciences) for 20 min at 37°C, followed by CCR4-PE-Cy7 (1G1,  
531 BDBiosciences), CCR7-PerCPCy5.5 (UCHL1, BioLegend), CD4-APCef780 (RPA-T4,  
532 eBiosciences), CD3-AF700 (UCHT1, BD Pharmigen) CD45RA-eF450 (HI100, eBiosciences),  
533 CD8-V500 (RPA-T8, BD Biosciences), CD14-V500 (M5E2; BD Biosciences), CD19-V500  
534 (HIB19, BD Biosciences), and fixable viability dye eF506 (eBiosciences) at room temperature  
535 for 30 min. Gating strategy is shown in **Supplementary Figure 7a**.

536 For non-conventional T cells PBMCs were stained with 1:100 MR1 5-OP-RU or 6-FP (as a  
537 control) tetramer for 40 min at room temperature. The MR1 tetramer technology was developed  
538 jointly by Dr. J. McCluskey, Dr. J. Rossjohn, and Dr. D. Fairlie <sup>58</sup>, and the material was produced  
539 by the National Institutes of Health Tetramer Core Facility, as permitted to be distributed by the  
540 University of Melbourne. After 40 min, cells were also stained with fixable viability dye eF506  
541 (eBiosciences) and with CD3-AF700 (UCHT1, BD Pharmigen), CD4-APCef780 (RPA-T4,  
542 eBiosciences), CD8-BV650 (RPA-T8; BioLegend), CD14-V500 (M5E2; BD Biosciences), CD19-  
543 V500 (HIB19, BD Biosciences), CD161-APC (HP-3G10; eBiosciences), V $\alpha$ 7.2-PE-Cy7 (3C10,  
544 BioLegend), V $\alpha$ 24-PE-Dazzle594 (6B11, BioLegend), and  $\gamma\delta$ PAN TCR-FITC (11F2, BD  
545 Biosciences) for 30 min at room temperature. The gating strategy is shown in **Supplementary**  
546 **Figure 7b**. MR1+ T cells were defined as 5-OP-RU MR1 tetramer+, and CD4-, V $\alpha$ 24-,  $\gamma\delta$ PAN  
547 TCR-, V $\alpha$ 7.2+, and CD161+ through Boolean gating.

548 For the flow cytometry measurement of IFN $\gamma$  and IL-17, PBMCs were thawed and stimulated  
549 with 100 $\mu$ g/ml BCG or left unstimulated in the presence of 1 $\mu$ g/ml anti-CD28 (CD28.2  
550 eBioscience), and 1 $\mu$ g/ml anti-CD49d (9F10, BioLegend). Cells were incubated at 37°C for 5  
551 hours, after which 2.5 $\mu$ g/ml Brefeldin A and monensin was added for another 7 hours. Cells

552 were washed and blocked in 10% FBS for 10 mins at 4°C. Cells were then stained with CD4-  
553 APCef780 (RPA-T4, eBiosciences), CD3-AF700 (UCHT1, BD Pharmigen), CD8-BV650 (RPA-  
554 T8; BioLegend), CD14-V500 (M5E2; BD Biosciences), CD19-V500 (HIB19, BD Biosciences),  
555 fixable viability dye eF506 (eBiosciences) for 30 min at 4°C. Cells were washed twice and then  
556 fixed in 4% paraformaldehyde solution for 10 min at 4°C. Saponin buffer was used to  
557 permeabilize the cells by incubating them at room temperature for 10 min, followed by blocking  
558 in 10% FBS for 5 min at 4°C. Cells were then stained with IFN $\gamma$ -FITC (4S.B3, eBioscience) and  
559 IL-17-PE-Cy7 (eBio64DEC17, eBioscience) for 30 min at room temperature. Followed by  
560 washes and acquisition. The gating strategy is shown in **Supplemental figure 7c**.

#### 561 **Fluorescence-activated cell sorting**

562 PBMCs were thawed and  $2 \times 10^6$  cells were added per well in a 96 round bottom well plate.  
563 Cells were stimulated with BCG (50 $\mu$ g/ml), MTB300 (2 $\mu$ g/ml), Tetanus pool (2 $\mu$ g/ml), or DMSO  
564 (corresponding to the percent DMSO in the peptide pools) as a control. Anti-human CD28 and  
565 CD3 (1  $\mu$ g/ml) was used as a positive control. The wells for the positive control was pre-coated  
566 overnight at 4°C. Cells were incubated at 37°C for 24 h.

567 The following day, cells were washed and incubated in PBS with 10% FBS at 4°C for 10  
568 min. They were stained with fixable viability dye eFluor 506 (eBioscience), and an antibody  
569 cocktail containing anti-human CD3-Alexa Fluor 700 (UCHT1, BD Bioscience), CD4-APCeFluor  
570 780 (RPA-T4, eBioscience), CD8-V500 (RPA-T8, BD Biosciences), CD45RA-eFluor 450  
571 (HI100, eBioscience), and CCR7-PerCPCy5.5 (UCHL1, BioLegend) for 20 min at room  
572 temperature. Cells were transferred into a 5 ml polypropylene FACS tube (BD Biosciences) and  
573 PBMCs (excluding doublets) and CD4 memory T cells were sorted on a FACSAria III cell sorter  
574 (Becton Dickinson) into QIAzol Lysis Reagent (QIAGEN). A total of 100,000 cells was sorted per  
575 sample. For gating strategy see **Supplementary figure 7d**. Sorted cell populations were stored  
576 in QIAzol Lysis Reagent at -80°C until RNA extraction.



577 **CD4 T cell isolation**

578 CD4+ T cells were isolated from at least  $5 \times 10^6$  PBMCs on the day of thaw by negative  
579 selection using the CD4+ T cell isolation kit II (Miltenyi Biotec, Bergisch Gladbach, Germany)  
580 according to manufacturer's instructions. The isolated CD4+ T cells were washed, pelleted, and  
581 then stored at  $-80^\circ\text{C}$  until DNA extraction.

582 **Cell expansion for TCR sequencing**

583 For *in vitro* expansion, cryopreserved PBMCs were thawed in RPMI supplemented with 5%  
584 human serum (Gemini Bio-Products, West Sacramento, CA), 1% Glutamax (Gibco, Waltham,  
585 MA), 1% penicillin/streptomycin (Omega Scientific, Tarzana, CA), and 50 U/ml Benzodase  
586 (Millipore Sigma, Burlington, MA). The cells were then washed and viability was evaluated using  
587 trypan blue dye exclusion. Briefly, at a density of  $2 \times 10^6$  cells per mL, the cells were plated in a  
588 well of a 24-well plate in the presence of 50  $\mu\text{g}/\text{ml}$  BCG, 2  $\mu\text{g}/\text{ml}$  MTB300, or 2  $\mu\text{g}/\text{ml}$  tetanus  
589 peptide pool, and were incubated in a  $37^\circ\text{C}$  humidified  $\text{CO}_2$  incubator for 14 days. Every 3-4  
590 days cells were supplied with 10 U/ml recombinant human IL-2. After 14 days of culture, cells  
591 were harvested, counted, and pelleted. The cell pellets were stored at  $-80^\circ\text{C}$  until DNA  
592 extraction.

593 **RNA sequencing**

594 RNA sequencing was performed as described previously (24). Briefly, total RNA was  
595 purified using an miRNeasy Micro Kit (QIAGEN) and quantified by quantitative PCR, as  
596 described previously (25). Purified total RNA (1–5ng) was amplified following the Smart-Seq2  
597 protocol (16 cycles of cDNA amplification) (26). cDNA was purified using AMPure XP beads  
598 (Beckman Coulter). From this step, 1 ng of cDNA was used to prepare a standard Nextera XT  
599 sequencing library (Nextera XT DNA sample preparation kit and index kit, Illumina). Whole-  
600 transcriptome amplification and sequencing library preparations were performed in a 96-well  
601 format to reduce assay-to-assay variability. Quality-control steps were included to determine

602 total RNA quality and quantity, the optimal number of PCR preamplification cycles, and  
603 fragment size selection. Samples that failed quality control were eliminated from further  
604 downstream steps. Barcoded Illumina sequencing libraries (Nextera; Illumina) were generated  
605 using the automated platform (Biomek FXp). Libraries were sequenced on a NovaSeq 6000  
606 Illumina platform to obtain 50-bp paired end reads (TruSeq Rapid kit; Illumina).

### 607 **TCR sequencing**

608 DNA was extracted from the cultured cells or ex vivo CD4<sup>+</sup> T cell samples using DNeasy  
609 Blood and Tissue kit (Qiagen, Hilden, Germany) according to manufacturer's instructions.  
610 Samples were sent to Adaptive Biotechnologies (Seattle, WA) for TCRB sequencing according  
611 to their protocol. The ex vivo CD4<sup>+</sup> T cell samples were sequenced with "deep resolution" to  
612 cover a maximum number of clonotypes in the repertoire. Samples that were stimulated with  
613 peptide pools for 14 days and then harvested were sequenced with "survey resolution".

### 614 **Data analysis – RNA sequencing**

615 Paired-end reads that passed Illumina filters were filtered for reads aligning to tRNA, rRNA,  
616 adapter sequences, and spike-in controls. The reads were aligned to the GRCh38 reference  
617 genome and Gencode v27 annotations using TopHat v1.4.1<sup>59</sup>. DUST scores were calculated  
618 with PRINSEQ Lite v0.20.3<sup>60</sup> and low-complexity reads (DUST > 4) were removed from BAM  
619 files. The alignment results were parsed via SAMtools<sup>61</sup> to generate SAM files. Read counts to  
620 each genomic feature were obtained with the htseq-count program v0.7.1<sup>62</sup> using the "union"  
621 option. Raw counts were imported into R v3.6.1 where they were subset into PBMC and CD4  
622 memory, both containing unstimulated, MTB300 peptide pool, and BCG epitope pool stimulated  
623 samples. The following steps were performed on PBMC and CD4 memory subsets  
624 independently. R/Bioconductor package DESeq2 v.1.24.0<sup>63</sup> was used to normalize raw counts.  
625 Variance stabilizing transformation was applied to normalized counts to obtain log<sub>2</sub> gene  
626 expression values. Quality control was performed using boxplots and Principal component  
627 analysis (PCA), using the 'prcomp' function in R, on log<sub>2</sub> expression values. Differentially

628 expressed genes were identified using the DESeq2 Wald test, and p-values were adjusted for  
629 multiple test correction using the Benjamini Hochberg algorithm <sup>64</sup> (**Supplementary Table 1**).  
630 Genes with adjusted p values < 0.05 and log2 fold change > 1 or < -1 were considered  
631 differentially expressed. Pathway enrichment analysis was performed using ToppGene Suite:  
632 ToppFun <sup>65</sup> (**Supplementary Table 2**), and cell type enrichment was performed using DICE <sup>66</sup>.

### 633 **Data analysis – TCR sequencing**

634 Pre-processing and quality control of the raw data was performed using the immunoSEQ  
635 analyzer (Adaptive Biotechnologies, Inc.). Measurement metrics of processed data were  
636 exported in the tsv file format and downstream data analysis was performed in Python v3.7.2  
637 and in R v3.6.1. To identify clonotypes that were expanded in culture or after vaccine, each of  
638 the replicates per donor was compared to the corresponding ex vivo CD4 sample, and p-values  
639 and odds-ratio were calculated using a two-sided Fisher exact test, using the 'fisher\_exact'  
640 function in the SciPy.Stats v1.4.1 <sup>67</sup> and NumPy v1.17.2 <sup>68</sup> extensions of python. Clonotypes  
641 appearing in both replicates with  $-\log_2$  odds ratios (OR) >1 or <-1 and false discovery rate (FDR)  
642  $p\text{-value} \leq 0.05$  corrected for multiple testing using the Benjamini–Hochberg method <sup>64</sup>,  
643 calculated using the 'fdr correction' function from the statsmodels module v0.9.0 <sup>69</sup> for Python,  
644 were considered significant (**Supplementary Table 5**). For visualization purposes, all  $-\log_{10}$   
645 FDR p-values > 50 were set to 50. Sequence similarity by clustering was performed using  
646 GLIPH v1.0 with default parameters, to identify conserved motifs and global similarity of  
647 complementarity-determining region 3 (CDR3) sequences <sup>53</sup> (**Supplementary Table 6**).

648 We also used TCRMatch to determine sequence similarity <sup>31</sup>. Within each group, defined by  
649 a single subject, vaccination and expansion status, and CDR3 $\beta$  sequences were tested against  
650 each other. For groups with expanded sequences, all CDR3 $\beta$  were analyzed against each  
651 other. For groups with unexpanded TCRs, the number of CDR3 $\beta$  sequences were much greater  
652 than the number of expanded CDR3 $\beta$  sequences in the same individual, so random sampling

653 was performed. A sample of  $n$  sequences, with  $n$ =the number of expanded CDR3 $\beta$  sequences  
654 for the corresponding individual and vaccination status, was randomly selected and  
655 subsequently run through TCRMatch to assess intragroup similarity. 100 random samplings  
656 were performed for each group of unexpanded sequences. Cross-subject comparisons were  
657 performed by running TCRMatch on all possible pairs of sequences between all possible pairs  
658 of subjects. The number of HLA alleles shared by two subjects was calculated by comparing  
659 each subjects' HLA alleles for a given HLA locus against another subjects' corresponding HLA  
660 alleles. All pairwise combinations were compared for each gene, with a maximum of four shared  
661 allele pair combinations. For example, if subject 1 carried alleles X and Y, and subject 2 carried  
662 X and Z, the number of shared alleles was recorded as 1. Meanwhile, if subject 1 were  
663 homozygous for X, and subject 2 carried X and Z, the number of shared alleles was recorded as  
664 2. Finally, if both subjects were homozygous for the same allele, their number of shared allele  
665 pairs was counted as 4.

#### 666 **DNA methylome data acquisition and analyses**

667 The DNA methylome data was analyzed using the HumanMethylationEPIC (850K) array  
668 (Illumina, USA) as per manufacturer's instruction. The raw IDAT files of the DNA methylome  
669 data was processed using the ChAMP package<sup>70</sup> in R (v4.0.3) after using the default filtering  
670 criteria i) removing the CpGs with detection p-value >0.01, ii) filter out CpGs with <3 beads in at  
671 least 5% of samples per CpGs, iii) filter out all non-CpGs contained in the dataset, iv) removing  
672 all SNP-related CpGs, v) filter out all multi-hit probes, and vi) filter out all CpGs located in X and  
673 Y chromosomes. The filtered data was normalized using the  $\beta$  mixture quantile normalization  
674 (BMIQ) function using the ChAMP package. For each CpG site, the methylation  $\beta$  values were  
675 calculated, which represents the fraction of methylated cytosines at their particular CpG site  
676 (0=unmethylated, 1=fully methylated). The Houseman algorithm<sup>30</sup> was used to calculate the cell  
677 type deconvolution as the samples were drawn from the PBMCs for "before" and "after" samples  
678 separately. We performed a Shapiro-Wilk test to test the normality of the samples and used a t-

679 test to compare differences between the before and after group for each cell type. The  
680 differential methylation values (mean methylation difference, mmd) were calculated using the  
681 two different groups of samples, “before” and “after”. A total of 139 613 CpGs were identified as  
682 differentially methylated CpGs (DMCs). A volcano plot was generated using the  
683 EnhancedVolcano package of hypermethylated and hypomethylated CpGs. The differentially  
684 methylated CpGs were annotated using the human genome annotation (HG38.13) to find the  
685 corresponding genes (Differentially Methylated Genes, DMGs). The hyper and hypomethylated  
686 CpGs were annotated with the different chromosomal locations. The hyper and hypomethylated  
687 genes were compared with the up and downregulated differentially expressed genes using the  
688 venneuler package <sup>71</sup> (in house python script). A principal component analysis (PCA) was  
689 performed on the normalized  $\beta$  values of DNA methylome dataset using the factoMineR and  
690 factoExtra (<https://CRAN.R-project.org/package=factoextra>) packages. All DMCs were  
691 considered significant with the Benjamini-Hochberg (BH) corrected p-value < 0.15, if not stated  
692 otherwise. A list of DMGs intersected with DEGs were analyzed using the clusterProfiler  
693 package <sup>72</sup> using the Kyoto Encyclopedia of Genes and Genomes (KEGG) database.

#### 694 **Data availability**

695 The RNA-seq datasets analyzed as part of this study have been deposited in the NCBI  
696 Gene Expression Omnibus (GEO) database with the primary accession number GSE156422.

697

698 **AUTHOR CONTRIBUTIONS**

699 ASi, PD, ASe, BP, and CSLA participated in the design and direction of the study. ASi, PD, RK,  
700 KM, WC, JD, ML, and CSLA performed and analyzed experiments. GS and PV performed the  
701 RNAseq. PD performed the bioinformatics analysis, supervised by ASi. ML recruited  
702 participants and maintained participant data. EJP and SAM coordinated and performed HLA  
703 typing. ASi, PD, KM, ML, and CSLA wrote the manuscript. All authors read, edited and  
704 approved the manuscript.

705

706 **ACKNOWLEDGMENTS**

707 This study was supported by U19 AI118626, S10 RR027366, and S10 OD016262.

708

709 **COMPETING INTERESTS**

710 The authors declare no competing interests

711

712

713 **REFERENCES**

- 714 1 Colditz, G. A. *et al.* The efficacy of bacillus Calmette-Guerin vaccination of newborns and  
715 infants in the prevention of tuberculosis: meta-analyses of the published literature.  
716 *Pediatrics* **96**, 29-35 (1995).
- 717 2 Fine, P. E. Variation in protection by BCG: implications of and for heterologous  
718 immunity. *Lancet* **346**, 1339-1345 (1995).
- 719 3 Trunz, B. B., Fine, P. & Dye, C. Effect of BCG vaccination on childhood tuberculous  
720 meningitis and miliary tuberculosis worldwide: a meta-analysis and assessment of cost-  
721 effectiveness. *Lancet* **367**, 1173-1180, doi:10.1016/S0140-6736(06)68507-3 (2006).
- 722 4 Darrah, P. A. *et al.* Prevention of tuberculosis in macaques after intravenous BCG  
723 immunization. *Nature* **577**, 95-102, doi:10.1038/s41586-019-1817-8 (2020).
- 724 5 Manjaly Thomas, Z. R. & McShane, H. Aerosol immunisation for TB: matching route of  
725 vaccination to route of infection. *Transactions of the Royal Society of Tropical Medicine*  
726 *and Hygiene* **109**, 175-181, doi:10.1093/trstmh/tru206 (2015).
- 727 6 White, A. D. *et al.* Evaluation of the Immunogenicity of Mycobacterium bovis BCG  
728 Delivered by Aerosol to the Lungs of Macaques. *Clinical and vaccine immunology : CVI*  
729 **22**, 992-1003, doi:10.1128/CVI.00289-15 (2015).
- 730 7 Price, D. N., Kusewitt, D. F., Lino, C. A., McBride, A. A. & Muttill, P. Oral Tolerance to  
731 Environmental Mycobacteria Interferes with Intradermal, but Not Pulmonary,  
732 Immunization against Tuberculosis. *PLoS Pathog* **12**, e1005614,  
733 doi:10.1371/journal.ppat.1005614 (2016).
- 734 8 Barreto, M. L. *et al.* Causes of variation in BCG vaccine efficacy: examining evidence  
735 from the BCG REVAC cluster randomized trial to explore the masking and the blocking  
736 hypotheses. *Vaccine* **32**, 3759-3764, doi:10.1016/j.vaccine.2014.05.042 (2014).
- 737 9 Dourado, I. *et al.* Rates of adverse reactions to first and second doses of BCG  
738 vaccination: results of a large community trial in Brazilian schoolchildren. *Int J Tuberc*  
739 *Lung Dis* **7**, 399-402 (2003).
- 740 10 Rodrigues, L. C. *et al.* Effect of BCG revaccination on incidence of tuberculosis in school-  
741 aged children in Brazil: the BCG-REVAC cluster-randomised trial. *Lancet* **366**, 1290-1295,  
742 doi:10.1016/S0140-6736(05)67145-0 (2005).
- 743 11 Bekker, L. G. *et al.* A phase 1b randomized study of the safety and immunological  
744 responses to vaccination with H4:IC31, H56:IC31, and BCG revaccination in  
745 Mycobacterium tuberculosis-uninfected adolescents in Cape Town, South Africa.  
746 *EClinicalMedicine* **21**, 100313, doi:10.1016/j.eclinm.2020.100313 (2020).
- 747 12 Nemes, E. *et al.* Prevention of M. tuberculosis Infection with H4:IC31 Vaccine or BCG  
748 Revaccination. *N Engl J Med* **379**, 138-149, doi:10.1056/NEJMoa1714021 (2018).
- 749 13 Rakshit, S. *et al.* BCG revaccination boosts adaptive polyfunctional Th1/Th17 and innate  
750 effectors in IGRA+ and IGRA- Indian adults. *JCI Insight* **4**, doi:10.1172/jci.insight.130540  
751 (2019).
- 752 14 Nieuwenhuizen, N. E. & Kaufmann, S. H. E. Next-Generation Vaccines Based on Bacille  
753 Calmette-Guerin. *Front Immunol* **9**, 121, doi:10.3389/fimmu.2018.00121 (2018).

- 754 15 Scriba, T. J. *et al.* Dose-finding study of the novel tuberculosis vaccine, MVA85A, in  
755 healthy BCG-vaccinated infants. *The Journal of infectious diseases* **203**, 1832-1843,  
756 doi:10.1093/infdis/jir195 (2011).
- 757 16 McShane, H. *et al.* Recombinant modified vaccinia virus Ankara expressing antigen 85A  
758 boosts BCG-primed and naturally acquired antimycobacterial immunity in humans.  
759 *Nature medicine* **10**, 1240-1244, doi:10.1038/nm1128 (2004).
- 760 17 Nieuwenhuizen, N. E. *et al.* The Recombinant Bacille Calmette-Guerin Vaccine VPM1002:  
761 Ready for Clinical Efficacy Testing. *Front Immunol* **8**, 1147,  
762 doi:10.3389/fimmu.2017.01147 (2017).
- 763 18 Abebe, F. Is interferon-gamma the right marker for bacille Calmette–Guérin-induced  
764 immune protection? The missing link in our understanding of tuberculosis immunology.  
765 *Clinical & Experimental Immunology* **169**, 213-219, doi:10.1111/j.1365-  
766 2249.2012.04614.x (2012).
- 767 19 Kagina, B. M. *et al.* Specific T cell frequency and cytokine expression profile do not  
768 correlate with protection against tuberculosis after bacillus Calmette-Guerin vaccination  
769 of newborns. *American journal of respiratory and critical care medicine* **182**, 1073-1079,  
770 doi:201003-0334OC [pii]  
771 10.1164/rccm.201003-0334OC (2010).
- 772 20 Fletcher, H. A. *et al.* T-cell activation is an immune correlate of risk in BCG vaccinated  
773 infants. *Nature communications* **7**, 11290, doi:10.1038/ncomms11290 (2016).
- 774 21 Soares, A. P. *et al.* Bacillus Calmette-Guerin Vaccination of Human Newborns Induces T  
775 Cells with Complex Cytokine and Phenotypic Profiles. *J Immunol* **180**, 3569-3577 (2008).
- 776 22 Rodo, M. J. *et al.* A comparison of antigen-specific T cell responses induced by six novel  
777 tuberculosis vaccine candidates. *PLoS Pathog* **15**, e1007643,  
778 doi:10.1371/journal.ppat.1007643 (2019).
- 779 23 Burel, J. G. *et al.* Host Transcriptomics as a Tool to Identify Diagnostic and Mechanistic  
780 Immune Signatures of Tuberculosis. *Front Immunol* **10**, 221,  
781 doi:10.3389/fimmu.2019.00221 (2019).
- 782 24 Burel, J. G. *et al.* An Integrated Workflow To Assess Technical and Biological Variability  
783 of Cell Population Frequencies in Human Peripheral Blood by Flow Cytometry. *J Immunol*  
784 **198**, 1748-1758, doi:10.4049/jimmunol.1601750 (2017).
- 785 25 Arlehamn, C. L. *et al.* Transcriptional Profile of Tuberculosis Antigen-Specific T Cells  
786 Reveals Novel Multifunctional Features. *J Immunol* **193**, 2931-2940,  
787 doi:10.4049/jimmunol.1401151 (2014).
- 788 26 Pomaznoy, M. *et al.* Quantitative and Qualitative Perturbations of CD8(+) MAITs in  
789 Healthy Mycobacterium tuberculosis-Infected Individuals. *Immunohorizons* **4**, 292-307,  
790 doi:10.4049/immunohorizons.2000031 (2020).
- 791 27 Lindestam Arlehamn, C. S. *et al.* Immunological consequences of intragenus  
792 conservation of Mycobacterium tuberculosis T-cell epitopes. *Proc Natl Acad Sci U S A*  
793 **112**, E147-155, doi:10.1073/pnas.1416537112 (2015).
- 794 28 Kleinnijenhuis, J. *et al.* Bacille Calmette-Guerin induces NOD2-dependent nonspecific  
795 protection from reinfection via epigenetic reprogramming of monocytes. *Proc Natl Acad*  
796 *Sci U S A* **109**, 17537-17542, doi:10.1073/pnas.1202870109 (2012).



- 797 29 Verma, D. *et al.* Anti-mycobacterial activity correlates with altered DNA methylation  
798 pattern in immune cells from BCG-vaccinated subjects. *Scientific reports* **7**, 12305,  
799 doi:10.1038/s41598-017-12110-2 (2017).
- 800 30 Houseman, E. A. *et al.* Reference-free deconvolution of DNA methylation data and  
801 mediation by cell composition effects. *BMC Bioinformatics* **17**, 259, doi:10.1186/s12859-  
802 016-1140-4 (2016).
- 803 31 Chronister, W. D. *et al.* TCRMatch: Predicting T-Cell Receptor Specificity Based on  
804 Sequence Similarity to Previously Characterized Receptors. *Front Immunol* **12**, 640725,  
805 doi:10.3389/fimmu.2021.640725 (2021).
- 806 32 Fletcher, H. A. Systems approaches to correlates of protection and progression to TB  
807 disease. *Semin Immunol* **39**, 81-87, doi:10.1016/j.smim.2018.10.001 (2018).
- 808 33 Satti, I. & McShane, H. Current approaches toward identifying a correlate of immune  
809 protection from tuberculosis. *Expert Rev Vaccines* **18**, 43-59,  
810 doi:10.1080/14760584.2019.1552140 (2019).
- 811 34 Barker, L., Hessel, L. & Walker, B. Rational approach to selection and clinical  
812 development of TB vaccine candidates. *Tuberculosis (Edinb)* **92 Suppl 1**, S25-29,  
813 doi:10.1016/S1472-9792(12)70009-4 (2012).
- 814 35 Aranday Cortes, E., Kaveh, D., Nunez-Garcia, J., Hogarth, P. J. & Vordermeier, H. M.  
815 Mycobacterium bovis-BCG vaccination induces specific pulmonary transcriptome  
816 biosignatures in mice. *PLoS One* **5**, e11319, doi:10.1371/journal.pone.0011319 (2010).
- 817 36 Hoft, D. F. *et al.* PO and ID BCG vaccination in humans induce distinct mucosal and  
818 systemic immune responses and CD4(+) T cell transcriptomal molecular signatures.  
819 *Mucosal Immunol* **11**, 486-495, doi:10.1038/mi.2017.67 (2018).
- 820 37 Morgan, J. *et al.* Classical CD4 T cells as the cornerstone of antimycobacterial immunity.  
821 *Immunol Rev* **301**, 10-29, doi:10.1111/imr.12963 (2021).
- 822 38 Caccamo, N. *et al.* Multifunctional CD4(+) T cells correlate with active Mycobacterium  
823 tuberculosis infection. *Eur J Immunol* **40**, 2211-2220, doi:10.1002/eji.201040455 (2010).
- 824 39 Qiu, Z. *et al.* Multifunctional CD4 T cell responses in patients with active tuberculosis.  
825 *Scientific reports* **2**, 216, doi:10.1038/srep00216 (2012).
- 826 40 Smith, S. G., Zelmer, A., Blitz, R., Fletcher, H. A. & Dockrell, H. M. Polyfunctional CD4 T-  
827 cells correlate with in vitro mycobacterial growth inhibition following Mycobacterium  
828 bovis BCG-vaccination of infants. *Vaccine* **34**, 5298-5305,  
829 doi:10.1016/j.vaccine.2016.09.002 (2016).
- 830 41 Murray, R. A. *et al.* Bacillus Calmette Guerin vaccination of human newborns induces a  
831 specific, functional CD8+ T cell response. *J Immunol* **177**, 5647-5651,  
832 doi:10.4049/jimmunol.177.8.5647 (2006).
- 833 42 Lindestam Arlehamn, C. S. *et al.* Memory T cells in latent Mycobacterium tuberculosis  
834 infection are directed against three antigenic islands and largely contained in a  
835 CXCR3+CCR6+ Th1 subset. *PLoS Pathog* **9**, e1003130, doi:10.1371/journal.ppat.1003130  
836 (2013).
- 837 43 Gela, A. *et al.* Effects of BCG vaccination on donor unrestricted T cells in humans.  
838 *bioRxiv*, 2021.2004.2029.441927, doi:10.1101/2021.04.29.441927 (2021).

- 839 44 Nathan, A. *et al.* Multimodally profiling memory T cells from a tuberculosis cohort  
840 identifies cell state associations with demographics, environment and disease. *Nat*  
841 *Immunol* **22**, 781-793, doi:10.1038/s41590-021-00933-1 (2021).
- 842 45 Dijkman, K. *et al.* Prevention of tuberculosis infection and disease by local BCG in  
843 repeatedly exposed rhesus macaques. *Nat Med* **25**, 255-262, doi:10.1038/s41591-018-  
844 0319-9 (2019).
- 845 46 Cadena, A. M. *et al.* Concurrent infection with Mycobacterium tuberculosis confers  
846 robust protection against secondary infection in macaques. *PLoS Pathog* **14**, e1007305,  
847 doi:10.1371/journal.ppat.1007305 (2018).
- 848 47 Mahnke, Y. D., Brodie, T. M., Sallusto, F., Roederer, M. & Lugli, E. The who's who of T-  
849 cell differentiation: human memory T-cell subsets. *Eur J Immunol* **43**, 2797-2809,  
850 doi:10.1002/eji.201343751 (2013).
- 851 48 Sutherland, J. S., Adetifa, I. M., Hill, P. C., Adegbola, R. A. & Ota, M. O. C. Pattern and  
852 diversity of cytokine production differentiates between Mycobacterium tuberculosis  
853 infection and disease. *Eur J Immunol* **39**, 723-729, doi:10.1002/eji.200838693 (2009).
- 854 49 Somoskovi, A. & Salfinger, M. Nontuberculous mycobacteria in respiratory infections:  
855 advances in diagnosis and identification. *Clinics in laboratory medicine* **34**, 271-295,  
856 doi:10.1016/j.cll.2014.03.001 (2014).
- 857 50 Srivastava, S. & Ernst, J. D. Cutting edge: Direct recognition of infected cells by CD4 T  
858 cells is required for control of intracellular Mycobacterium tuberculosis in vivo. *J*  
859 *Immunol* **191**, 1016-1020, doi:10.4049/jimmunol.1301236 (2013).
- 860 51 Anderson, K. G. *et al.* Intravascular staining for discrimination of vascular and tissue  
861 leukocytes. *Nature protocols* **9**, 209-222, doi:10.1038/nprot.2014.005 (2014).
- 862 52 Sakai, S. *et al.* Cutting edge: control of Mycobacterium tuberculosis infection by a subset  
863 of lung parenchyma-homing CD4 T cells. *J Immunol* **192**, 2965-2969,  
864 doi:10.4049/jimmunol.1400019 (2014).
- 865 53 Glanville, J. *et al.* Identifying specificity groups in the T cell receptor repertoire. *Nature*  
866 **547**, 94-98, doi:10.1038/nature22976 (2017).
- 867 54 Song, I. *et al.* Broad TCR repertoire and diverse structural solutions for recognition of an  
868 immunodominant CD8(+) T cell epitope. *Nat Struct Mol Biol* **24**, 395-406,  
869 doi:10.1038/nsmb.3383 (2017).
- 870 55 Sulzer, D. *et al.* T cells from patients with Parkinson's disease recognize alpha-synuclein  
871 peptides. *Nature* **546**, 656-661, doi:10.1038/nature22815 (2017).
- 872 56 Lindestam Arlehamn, C. S. *et al.* A Quantitative Analysis of Complexity of Human  
873 Pathogen-Specific CD4 T Cell Responses in Healthy M. tuberculosis Infected South  
874 Africans. *PLoS Pathog* **12**, e1005760, doi:10.1371/journal.ppat.1005760 (2016).
- 875 57 da Silva Antunes, R. *et al.* Definition of Human Epitopes Recognized in Tetanus Toxoid  
876 and Development of an Assay Strategy to Detect Ex Vivo Tetanus CD4+ T Cell Responses.  
877 *PLoS One* **12**, e0169086, doi:10.1371/journal.pone.0169086 (2017).
- 878 58 Corbett, A. J. *et al.* T-cell activation by transitory neo-antigens derived from distinct  
879 microbial pathways. *Nature* **509**, 361-365, doi:10.1038/nature13160 (2014).
- 880 59 Trapnell, C., Pachter, L. & Salzberg, S. L. TopHat: discovering splice junctions with RNA-  
881 Seq. *Bioinformatics* **25**, 1105-1111, doi:10.1093/bioinformatics/btp120 (2009).

882 60 Schmieder, R. & Edwards, R. Quality control and preprocessing of metagenomic  
883 datasets. *Bioinformatics* **27**, 863-864, doi:10.1093/bioinformatics/btr026 (2011).  
884 61 Li, H. *et al.* The Sequence Alignment/Map format and SAMtools. *Bioinformatics* **25**,  
885 2078-2079, doi:10.1093/bioinformatics/btp352 (2009).  
886 62 Anders, S., Pyl, P. T. & Huber, W. HTSeq--a Python framework to work with high-  
887 throughput sequencing data. *Bioinformatics* **31**, 166-169,  
888 doi:10.1093/bioinformatics/btu638 (2015).  
889 63 Love, M. I., Huber, W. & Anders, S. Moderated estimation of fold change and dispersion  
890 for RNA-seq data with DESeq2. *Genome Biol* **15**, 550, doi:10.1186/s13059-014-0550-8  
891 (2014).  
892 64 Benjamini, Y. & Hochberg, Y. Controlling the False Discovery Rate: A Practical and  
893 Powerful Approach to Multiple Testing. *Journal of the Royal Statistical Society. Series B*  
894 *(Methodological)* **57**, 289-300 (1995).  
895 65 Chen, J., Bardes, E. E., Aronow, B. J. & Jegga, A. G. ToppGene Suite for gene list  
896 enrichment analysis and candidate gene prioritization. *Nucleic Acids Res* **37**, W305-311,  
897 doi:10.1093/nar/gkp427 (2009).  
898 66 Schmiedel, B. J. *et al.* Impact of Genetic Polymorphisms on Human Immune Cell Gene  
899 Expression. *Cell* **175**, 1701-1715 e1716, doi:10.1016/j.cell.2018.10.022 (2018).  
900 67 Jones, E., Oliphant, T. & Peterson, P. SciPy: Open source scientific tools for Python.  
901 (2001).  
902 68 Van Der Walt, S., Colbert, S. C. & Varoquaux, G. The NumPy array: a structure for  
903 efficient numerical computation. *Computing in Science & Engineering* **13**, 22 (2011).  
904 69 Seabold, S. & Perktold, J. in *Proceedings of the 9th Python in Science Conference*. 61  
905 (Scipy).  
906 70 Morris, T. J. *et al.* ChAMP: 450k Chip Analysis Methylation Pipeline. *Bioinformatics* **30**,  
907 428-430, doi:10.1093/bioinformatics/btt684 (2014).  
908 71 Wilkinson, L. Exact and Approximate Area-Proportional Circular Venn and Euler  
909 Diagrams. *IEEE Transactions on Visualization and Computer Graphics* **18**, 321-331,  
910 doi:10.1109/TVCG.2011.56 (2012).  
911 72 Yu, G., Wang, L. G., Han, Y. & He, Q. Y. clusterProfiler: an R package for comparing  
912 biological themes among gene clusters. *OMICS* **16**, 284-287, doi:10.1089/omi.2011.0118  
913 (2012).  
914  
915

916 **Figures and Legends**

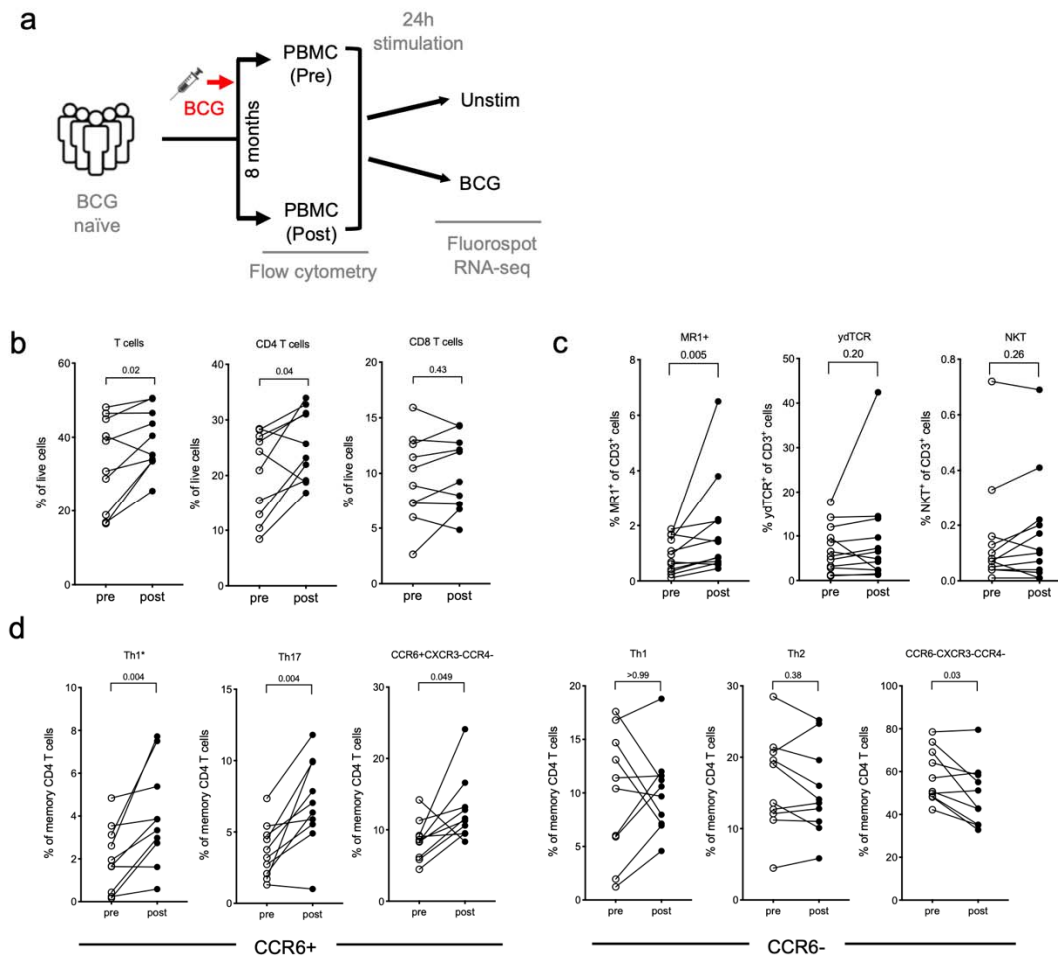

Figure 1

917

918 **FIGURE 1. T cell subsets show an increase post BCG vaccination.** **a** Schematic of the  
 919 project workflow. Flow cytometry analysis was performed on PBMC samples obtained from  
 920 BCG naïve individuals, pre and post BCG vaccination, and Fluorospot and RNA-sequencing on  
 921 PBMCs stimulated with either DMSO or BCG for 24 hours. **b-d** Frequencies of cell subsets pre-  
 922 (open circles) and post- (closed circles) BCG vaccination as determined by flow cytometry.  
 923 Each point represents one participant, Wilcoxon matched pair signed rank test. **b** T cells, CD4  
 924 and CD8 T cells. **c** MAITs; as defined by staining with MR1 5-OP-RU tetramer,  $\gamma\delta$  T cells;  
 925 defined by pan  $\gamma\delta$ TCR, and NKTs; defined by V $\alpha$ 24 staining. **d** T-helper subsets defined by  
 926 CXCR3, CCR6 and CCR4 expression.

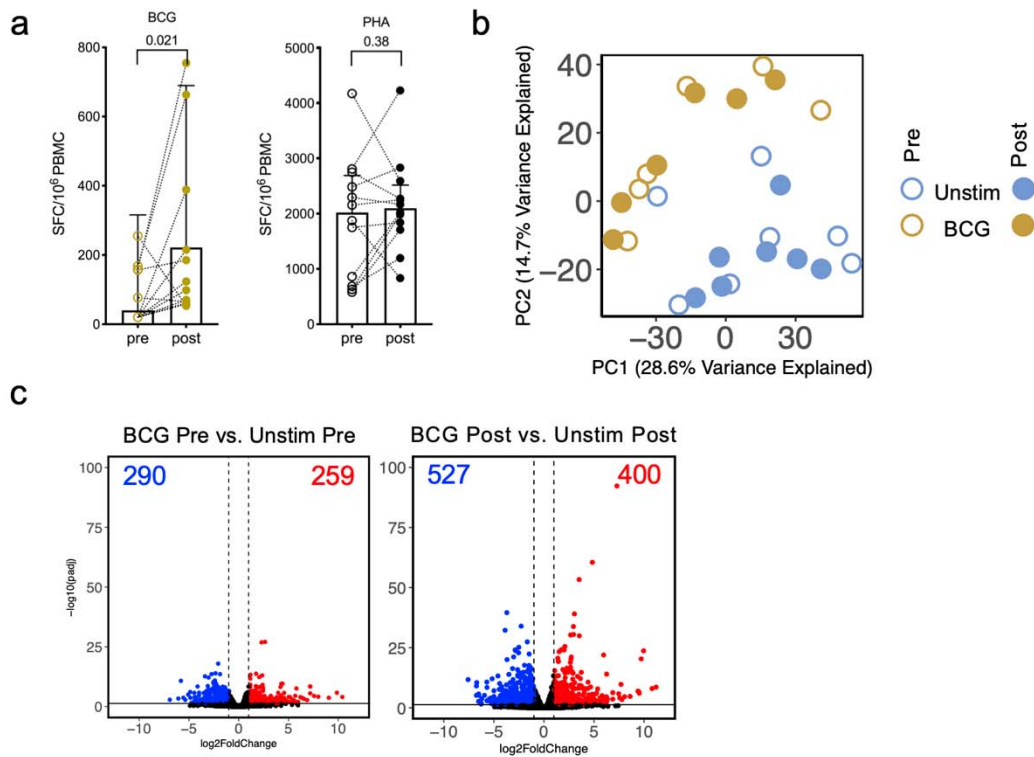

Figure 2

927

928 **FIGURE 2. BCG-induced T cell responses and gene expression changes are enhanced**

929 **upon BCG vaccination. a** Paired point graphs depicting magnitude of IFN $\gamma$  responses pre- and

930 post-vaccination, against BCG and PHA as SFC per 10<sup>6</sup> cultured PBMC as determined by

931 Fluorospot. Each point and symbol represent one participant, median  $\pm$  interquartile range is

932 shown. Wilcoxon matched pair signed rank test. **b** PCA depicting the variation in global gene

933 expression as a result of stimulation condition and vaccination. Pre-vaccination (open circles)

934 and post vaccination (closed circles), unstimulated samples (blue) and BCG stimulated samples

935 (gold). **c** Volcano plot depicting differentially expressed genes after BCG stimulation as

936 compared to unstimulated samples, pre- and post-vaccination. Red indicates upregulated genes

937 (adjusted p value < 0.05 and log<sub>2</sub> fold change > 1) and blue indicates downregulated genes

938 (adjusted p value < 0.05 and log<sub>2</sub> fold change < -1).

939

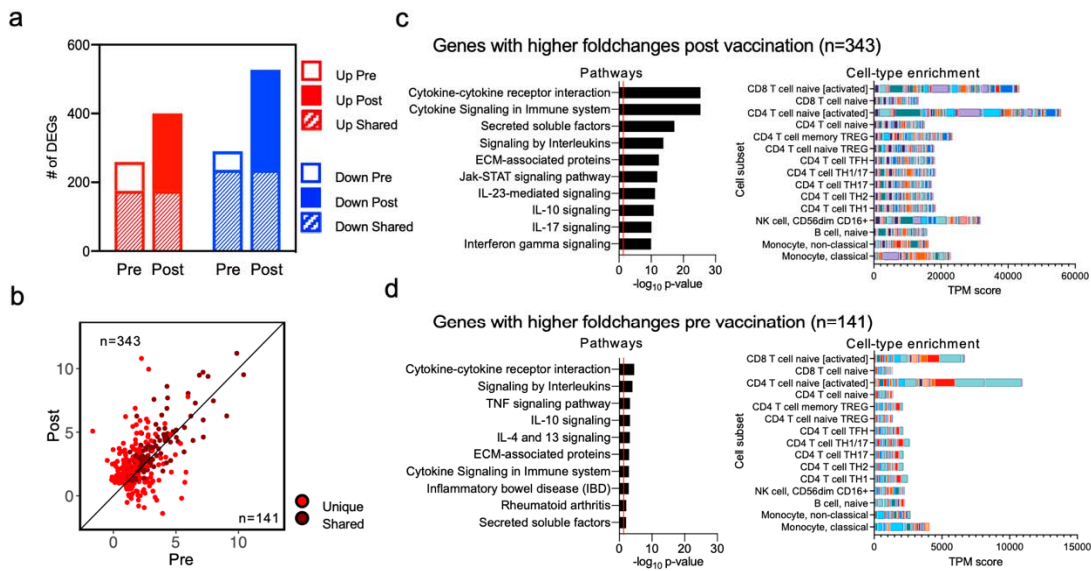

Figure 3

940

941 **FIGURE 3. BCG-induced gene expression changes are enhanced upon BCG vaccination.**

942 **a** Bar plots representing the total number of differentially expressed genes pre- and post-

943 vaccination. Empty and filled bars represent pre- and post-vaccination, respectively, color

944 represents up or down regulation, and hatched filling represents overlap of genes between the

945 pre and post time points. **b** Scatterplot of genes upregulated upon BCG stimulation in pre-

946 vaccination (x-axis) and post-vaccination (y-axis). Each dot represents the log<sub>2</sub> fold change for a

947 gene, and color represents shared (gene significantly differentially expressed in both pre- and

948 post-vaccination) or unique (differentially expressed in only one condition) expression. Black line

949 at the 45° slope represents identical perturbation in pre- and post-vaccination, with genes above

950 or below the line showing higher perturbation in the post or pre-group, respectively. **c, d**

951 Pathway and cell-type enrichment (dice-database.org) for genes with **(c)** higher log<sub>2</sub> fold

952 changes post vaccination, and **(d)** higher log<sub>2</sub> fold changes pre-vaccination. The ten most

953 significant pathways are shown.

954

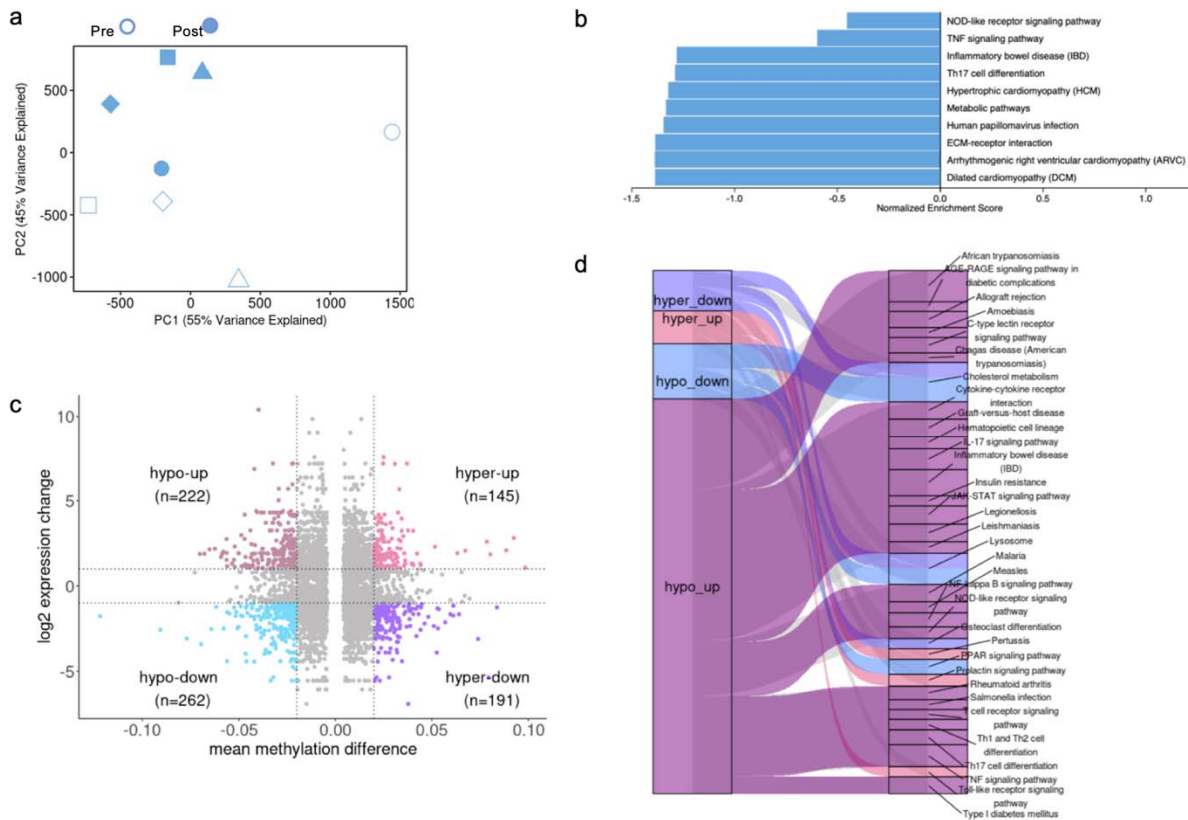

Figure 4

955  
 956 **FIGURE 4. BCG-induced DNA methylation changes.** **a** PCA of the overall DNA methylome  
 957 data. Unstimulated pre-vaccination (open symbols) and post vaccination (closed symbols)  
 958 samples. **b** Pathway enrichment for DMGs derived from hypomethylated CpGs. **c** Scatter plot  
 959 representing the overlap of hypermethylated, hypomethylated, upregulated and downregulated  
 960 genes post-vaccination. The vertical dotted lines represent the cut-off value of  $mmd \geq |0.02|$  and  
 961 the horizontal dotted lines represent the  $\log_2$  expression value cut-off  $\geq |1|$ . **d** Pathway  
 962 enrichment analysis of overlapping significant DEGs and DMGs using the KEGG database. The  
 963 Gene Set Enrichment Analysis was performed using the 2000 permutations and BH-corrected  
 964  $p$ -value  $< 0.05$  on the common gene list with  $mmd$  values. The resulting map of enriched  
 965 pathways using KEGG database in different combinations of DMGs and DEGs is shown. Edge  
 966 width indicates the number of significant pathways involved with the corresponding DMG-DEG  
 967 list.  
 968

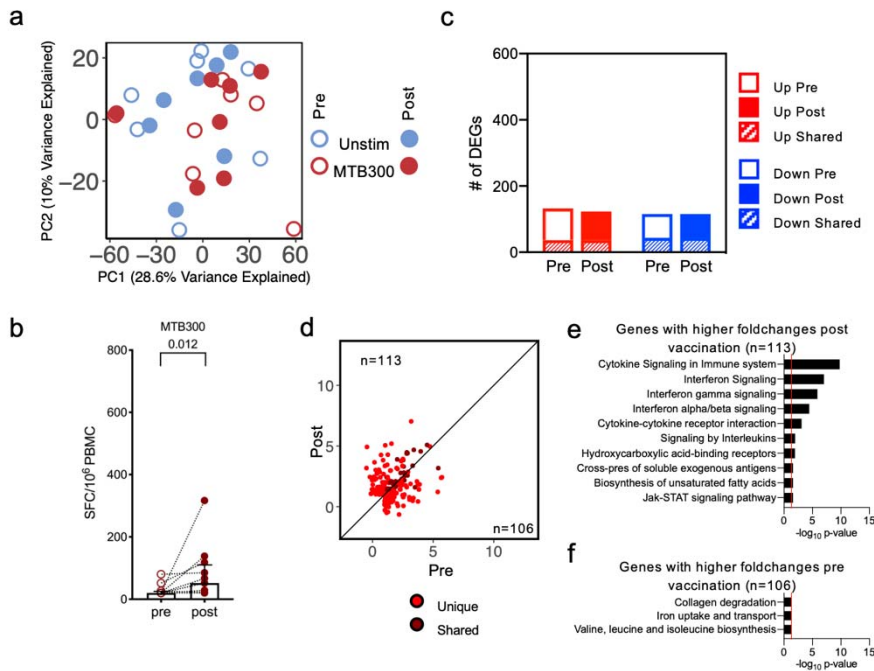

Figure 5

969

970 **FIGURE 5. MTB300 peptide pool stimulation has a small impact on BCG vaccination. a**

971 PCA depicting variation in global gene expression as a result of stimulation condition and

972 vaccination. Empty and filled circles represent the pre- and post-vaccination time points,

973 respectively, and color represents stimulation condition. **b** Paired point graphs depicting

974 magnitude of responses (sum of IFN $\gamma$ , IL-5, and IL-10) pre- and post-vaccination, against

975 MTB300, as SFC per 10<sup>6</sup> cultured PBMC. Each point and symbol represent one participant,

976 median  $\pm$  interquartile range is shown. Wilcoxon matched pair signed rank test. **c** Bar plots

977 representing the total number of differentially expressed genes pre- and post-vaccination.

978 Empty and filled bars represent pre- and post-vaccination, respectively, color represents up or

979 down regulation, and hatched filling represents overlap of genes between the pre and post time

980 points. **d** Scatterplot of genes upregulated upon MTB300 stimulation in pre-vaccination (x-axis)

981 and post-vaccination (y-axis). Each dot represents the log<sub>2</sub> fold change for a gene, and color

982 represents shared (gene significantly differentially expressed in both pre- and post-vaccination)

983 or unique (differentially expressed in only one condition) expression. Black line at the 45 $^\circ$  slope

984 represents identical perturbation in pre- and post-vaccination, with genes above or below the

985 line showing higher perturbation in the post- or pre-group, respectively. **e** Pathway enrichment

986 for genes with higher log<sub>2</sub> fold changes post vaccination. The ten most significant pathways are

987 shown. **f** Pathway enrichment for genes with higher log<sub>2</sub> fold changes pre vaccination.



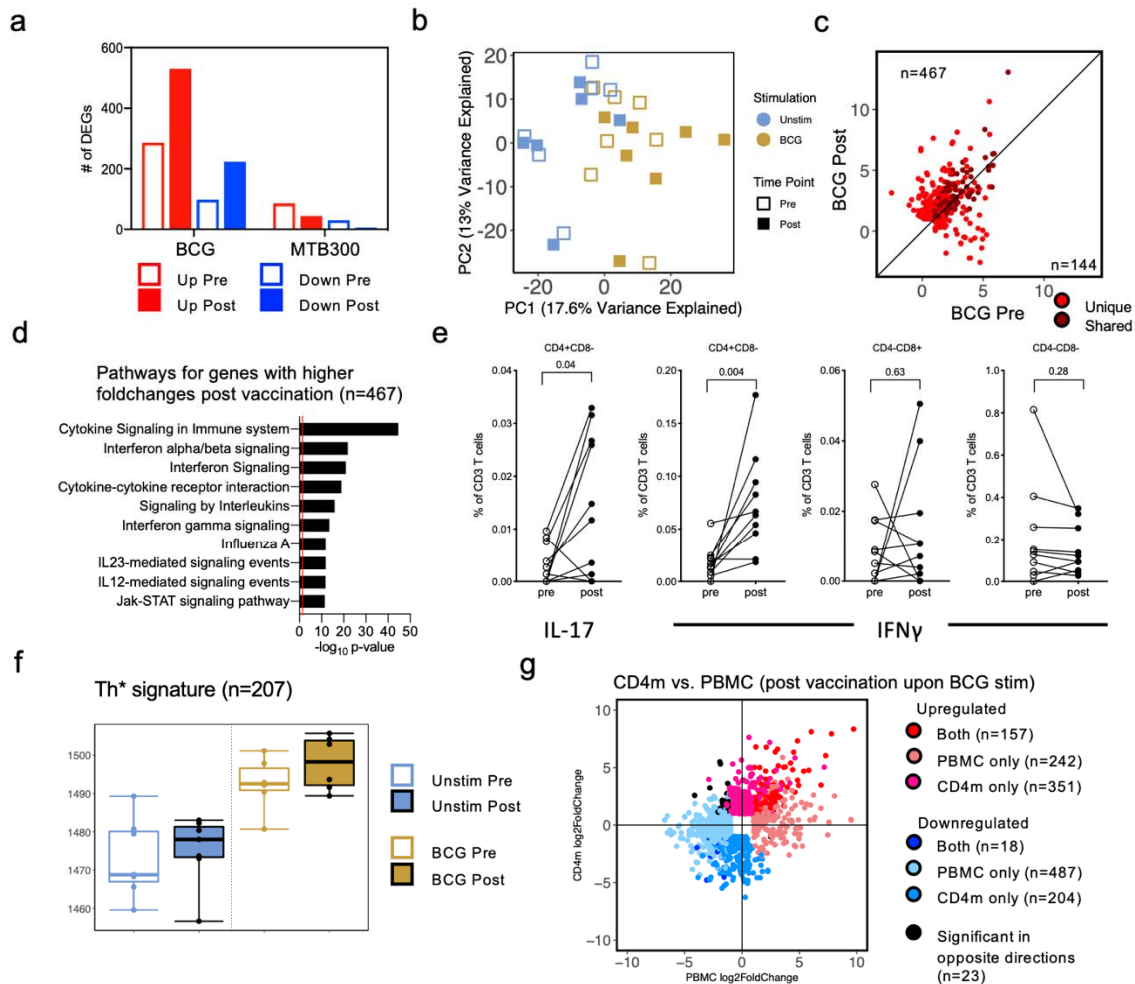

Figure 6

988

989 **FIGURE 6. CD4 memory T cells show enhanced gene expression post BCG vaccination in**

990 **BCG stimulated samples.** a Grouped bar plots representing differentially expressed genes

991 identified in BCG and MTB300 stimulation, pre- and post-vaccination. Empty bars and filled bars

992 represent pre- and post-vaccination, respectively, and color represents up or down regulation. b

993 Principal component analysis depicting the variation in global gene expression as a result of

994 stimulation condition and vaccination. Empty and filled squares represent the pre- and post-

995 vaccination time points, respectively, and color represents stimulation condition. c Scatterplot of

996 genes upregulated upon BCG stimulation in pre-vaccination (x-axis) and post-vaccination (y-

997 axis). Each dot represents the  $\log_2$  fold change for a gene, and color represents shared (gene

998 significantly differentially expressed in both pre- and post-vaccination) or unique (differentially

999 expressed in only one condition) expression. Black line at the 45° slope represents identical

1000 perturbation in pre- and post-vaccination, with genes above or below the line showing higher  
1001 perturbation in the post- or pre-group, respectively. **d** Pathway enrichment for genes with higher  
1002  $\log_2$  fold changes post vaccination. The ten most significant pathways are shown. **e** Percentage  
1003 cytokine (IL-17 or IFN $\gamma$ ) detected from T cells in response to BCG. Each dot represents one  
1004 donor, median  $\pm$  interquartile range is shown. Wilcoxon matched pair signed rank test. **f** Boxplot  
1005 of RNA-sequencing data depicting the sum of  $\log_2$  expression values (variance stabilizing  
1006 transformation, VST) for all genes in the Th1\* cell signature. Empty and filled boxplot represent  
1007 pre- and post-vaccination, respectively, and color represents stimulation condition. Each dot  
1008 represents an individual donor. **g** Scatterplot of genes differentially expressed between post-  
1009 vaccination in BCG stimulated compared to unstimulated samples, in PBMC (x-axis) and CD4  
1010 memory T cells (y-axis). Each dot represents the  $\log_2$  fold change for a gene, and color  
1011 represents shared or uniquely differentially expressed genes in PBMC or CD4m.  
1012

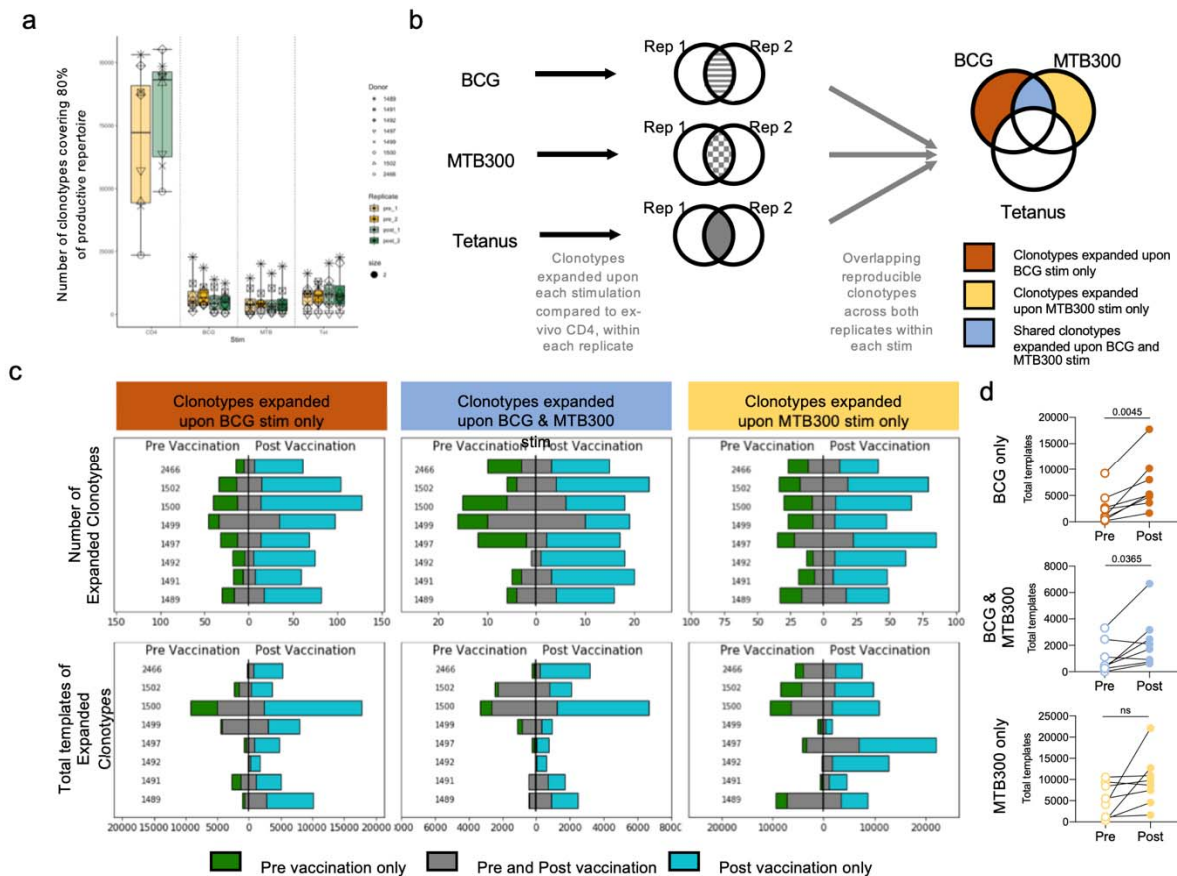

Figure 7

1013  
 1014 **FIGURE 7. BCG and MTB300 stimulation elicit specific T cell responses.** **a** Number of TCR  
 1015 clonotypes covering 80% of the productive repertoire across stimulation conditions and pre- and  
 1016 post-vaccination. Color, yellow and green, represents pre- and post-vaccination, respectively.  
 1017 Each symbol represents one donor. Replicate samples are indicated by the intensity of the color  
 1018 (lighter and darker shade). **b** TCR-sequencing was performed on CD4<sup>+</sup> T cell samples obtained  
 1019 from BCG naïve individuals (n=8), stimulated with the BCG epitope pool, MTB300 peptide pool,  
 1020 or the tetanus peptide pool. Only those clonotypes that expanded upon stimulation compared to  
 1021 ex-vivo CD4 samples across both replicates were retained within each stimulation condition.  
 1022 The resulting clonotypes in the three stimulation conditions were overlapped to obtain  
 1023 clonotypes that expanded upon BCG stimulation only, MTB300 stimulation only, and clonotypes  
 1024 expanded in both BCG and MTB300 stimulation. Any clonotype expanded upon tetanus  
 1025 stimulation was excluded. This process was repeated for samples obtained post-vaccination. **c**  
 1026 Bar graphs showing the number of expanded clonotypes, and the total templates for these  
 1027 clonotypes, across different conditions, pre- and post-vaccination. Blue indicates clonotypes

1028 unique to post-vaccination, green indicates clonotypes unique to pre-vaccination, and grey  
1029 indicates clonotypes that expanded in both pre- and post-vaccination. **d** Quantification of total  
1030 templates expanded in pre- and post-vaccination for individual donors in each condition. Empty  
1031 and filled circles represent pre- and post-vaccination, respectively.  
1032
